# Short-term effects of fishing on life history traits of fishes

Marie-Joëlle Rochet

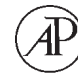

Rochet, M. J. 1998. Short-term effects of fishing on life history traits of fishes. – ICES Journal of Marine Science, 55: 371–391.

An important aspect of species susceptibility to fishing are the changes in demographic characteristics of populations that fishing might induce. The purpose of this study is to show the short-term effects of fishing on growth and reproduction patterns. This assessment is made through a comparative study of key parameters (mortality, size, age and size at maturity, fecundity) among stocks subject to various levels of exploitation. Data have been assembled for 77 separate (primarily commercial) fish stocks.

Trait variation is partitioned into effects attributable to size, phylogeny, and population. High adult mortality appears to lead to short-term apparently plastic changes in age and size at maturity: exploited populations are characterized by earlier age and increased size at maturity. This compensatory response to exploitation may conceal longer term selection effects, and may be worth considering in stock assessments.

© 1998 International Council for the Exploration of the Sea

Key words: allometry, comparative method, fishing effects, life history, mortality, phenotypic plasticity, reproduction, teleost fishes.

Received 7 January 1997; accepted 11 November 1997.

Marie-Joëlle Rochet: Laboratoire MAERHA, IFREMER, Rue de l'Île d'Yeu, B.P. 21105, 44311 Nantes Cedex 03, France: tel: +33 2 40 37 41 21; fax: +33 2 40 37 40 75; e-mail: mjrochet@ifremer.fr

## Introduction

Demographic traits of fishes, such as growth and reproduction patterns, may change under fishing pressure. For example, changes in the growth of Pacific Salmon (Ricker, 1981) and of North Sea sole (de Veen, 1976) and plaice (Rijnsdorp and van Leeuwen, 1996) have been documented. Age and size at sexual maturity have changed for Atlantic cod on the Scotian Shelf (Beacham, 1983), for Atlantic Salmon in North America (Schaffer and Elson, 1975), for North-east Arctic cod (Jørgensen, 1990) and for many stocks of cod, haddock and other fish of the North-west Atlantic (Trippel, 1995). Changes in fecundity have been reported for Atlantic Herring in the Western Gulf of Maine (Kelly and Stevenson, 1985) and for North Sea plaice (Horwood *et al.*, 1986; Rijnsdorp, 1991).

These changes in life history may influence population dynamics. In some cases, their importance in stock assessment has been shown by empirical models: density-dependent growth should be taken into account for North Sea plaice and haddock, otherwise the potential increases in yield expected from a reduced fishing intensity or increased mesh size would be overestimated (Beverton and Holt, 1957). An assessment taking into

account the compensatory responses of the North-west Atlantic mackerel stock led to less optimistic yield projections than classical assessment (Overholtz *et al.*, 1991).

It has, however, proven difficult to demonstrate the fishing origin of these changes because of phenotype-environment interactions (Pitt, 1975; Hempel, 1978; Kotilainen and Aro, 1991; Rijnsdorp *et al.*, 1991; Parmanne, 1992; Rijnsdorp and van Leeuwen, 1992). In addition, published analyses may result in conflicting conclusions: for example, under sustained fishing pressure, length at maturity decreased in North Sea cod from 1920 to 1970 (Hempel, 1978) and in Scotian Shelf cod between 1959 and 1979 (Beacham, 1983), but remained stable in Grand Bank American Plaice from 1957 to 1971 (Pitt, 1975), and increased in North Sea sole between 1957 and 1973 (de Veen, 1976).

Some of these difficulties can be overcome by a comparative approach that consists of comparing data from a large number of populations. The effects of fishing are then statistically separated from residual environmental fluctuations.

The purpose of this study is to investigate the short-term effects of fishing on growth and reproduction patterns. Demographic traits (mortality, size, age and

size at maturity, fecundity) of many fish populations subject to various levels of exploitation are collated from the literature. These traits are analysed with methods developed in the field of evolutionary ecology in order to separate the effect of fishing from other effects. Relationships between adult mortality, variation in which is assumed to be mainly due to fishing, and the other traits are then analysed by multivariate analyses.

## Materials

### Demographic traits

Traits to be included in such a comparative study may be numerous (Stearns, 1992; see e.g. Hutchings and Morris, 1985; Jennings and Beverton, 1991; Beverton, 1992). The main constraint upon trait selection is the need for reliable estimates of the variables, otherwise the conclusion of the comparative analysis may be spurious (Gaillard *et al.*, 1994). We concentrated on female traits and the following are included:

- We define the time-to-5%-survival ( $T_{0.05}$ ) as the time elapsed from sexual maturity until 95% of a cohort is dead. Life span, commonly used as an indicator of survival, is often estimated by maximum observed age (Beverton and Holt, 1959; Murphy, 1968; Mann *et al.*, 1984; Roff, 1984; Hutchings and Morris, 1985; Jennings and Beverton, 1991; Beverton, 1992). However, such estimates may be biased and highly dependent on the size of the sample used. Kremenz *et al.* (1989) demonstrated that annual survival rates are preferable to observed maximum lifespan in comparative life-history studies. However, annual survival rates may vary between age classes for fish. Moreover, in most fish senescence will not occur and the mortality patterns in a population will not be uniform. Therefore time-to-5%-survival is better suited to fish than life expectation (time-to-50%-survival), as it integrates mortality rates over most adult life. Time-to-5%-survival is estimated from an exponential mortality model, on the basis of total mortality coefficients  $Z=F+M$  estimated by VPA or catch curves. This overcomes the problem of the natural mortality coefficient  $M$ , which is generally poorly estimated, because errors on  $M$  are compensated for by errors on the estimated fishing mortality  $F$ . This was checked by a sensitivity analysis (Appendix A): VPA-based estimates of  $Z$  are most sensitive to errors in  $M$  in the young partially recruited age-classes because  $M/F$  is high in these age classes relative to older age classes. These young age classes are not included in the computation of time-to-5%-survival. This is valid for exploited stocks with  $F>M$  in older age classes. In unexploited or weakly exploited populations,  $Z$  is estimated by a catch-curve. Time-to-5%-survival is directly influenced by fishing as it includes fishing mortality.

- Length-at-5%-survival ( $L_{0.05}$ ) is an adult-size parameter, arbitrarily measured at time-to-5%-survival because of the indeterminate growth of fishes. The  $L_{\infty}$  parameter of the von Bertalanffy (1934) growth model is usually used in comparative studies of growth or size in fishes (Beverton and Holt, 1959; Beverton, 1963, 1992; Adams, 1980; Pauly, 1980; Roff, 1984, 1991; Gunderson and Dygert, 1988; Jennings and Beverton, 1991). Hutchings and Morris (1985) use maximum length, which has the same potential disadvantages as maximum lifespan. Pauly (1980) defines  $L_{\infty}$  as "the mean size the fish of a given stock would reach if they were to grow indefinitely in the manner described by the [von Bertalanffy] formula". We are mostly interested in exploited stocks, where few, if any, fish have the opportunity to reach that size. Moreover,  $L_{\infty}$  is generally poorly estimated in stocks for which data are available only for young (and small) age-classes.

- Age and length at sexual maturity ( $A_m$  and  $L_m$ ): we use length and age at which 50% of the individuals reach maturity, as published by the authors.

- Fecundity ( $F_b$ ): a mean fecundity per female is difficult to estimate and would include the errors on many terms (e.g. size structure and size-specific fecundity). It seems therefore preferable to include in the study the parameters of the fecundity-length relationship:  $F=aL^b$ . However, the estimate of  $a$  is generally biased because of the log-log procedure used. Finally we use only the power  $b$  of the relationship, which is the slope of the log-log fecundity-length regression.

The data are collated from published papers and Working Groups Reports (listed in Appendix B). One difficulty is the need for contemporaneous estimates of all traits for a given stock. The purpose of the study is indeed to examine the effects of fishing mortality on life history traits, but we do not know beforehand how rapidly such effects might appear. I compiled life history data on 77 populations from 49 species of primarily commercial teleost fishes; for some of them I have data for different periods of time. The data are available from the author.

### Phylogenetic information

Most of the phylogenetic information used to remove the phylogenetic effects (see Methods below) arises from Eschmeyer (1990) and Lecointre (1994). Additional information obtained from Lecointre (pers. comm.) permits construction of the topology of a phylogenetic tree with few unresolved nodes (Fig. 1), based on morpho-anatomical characters. Branch lengths however are not known: DNA sequence data from parts of the genome can provide information for branch length estimation (Nei, 1987; Harvey and Pagel, 1991), but they are not

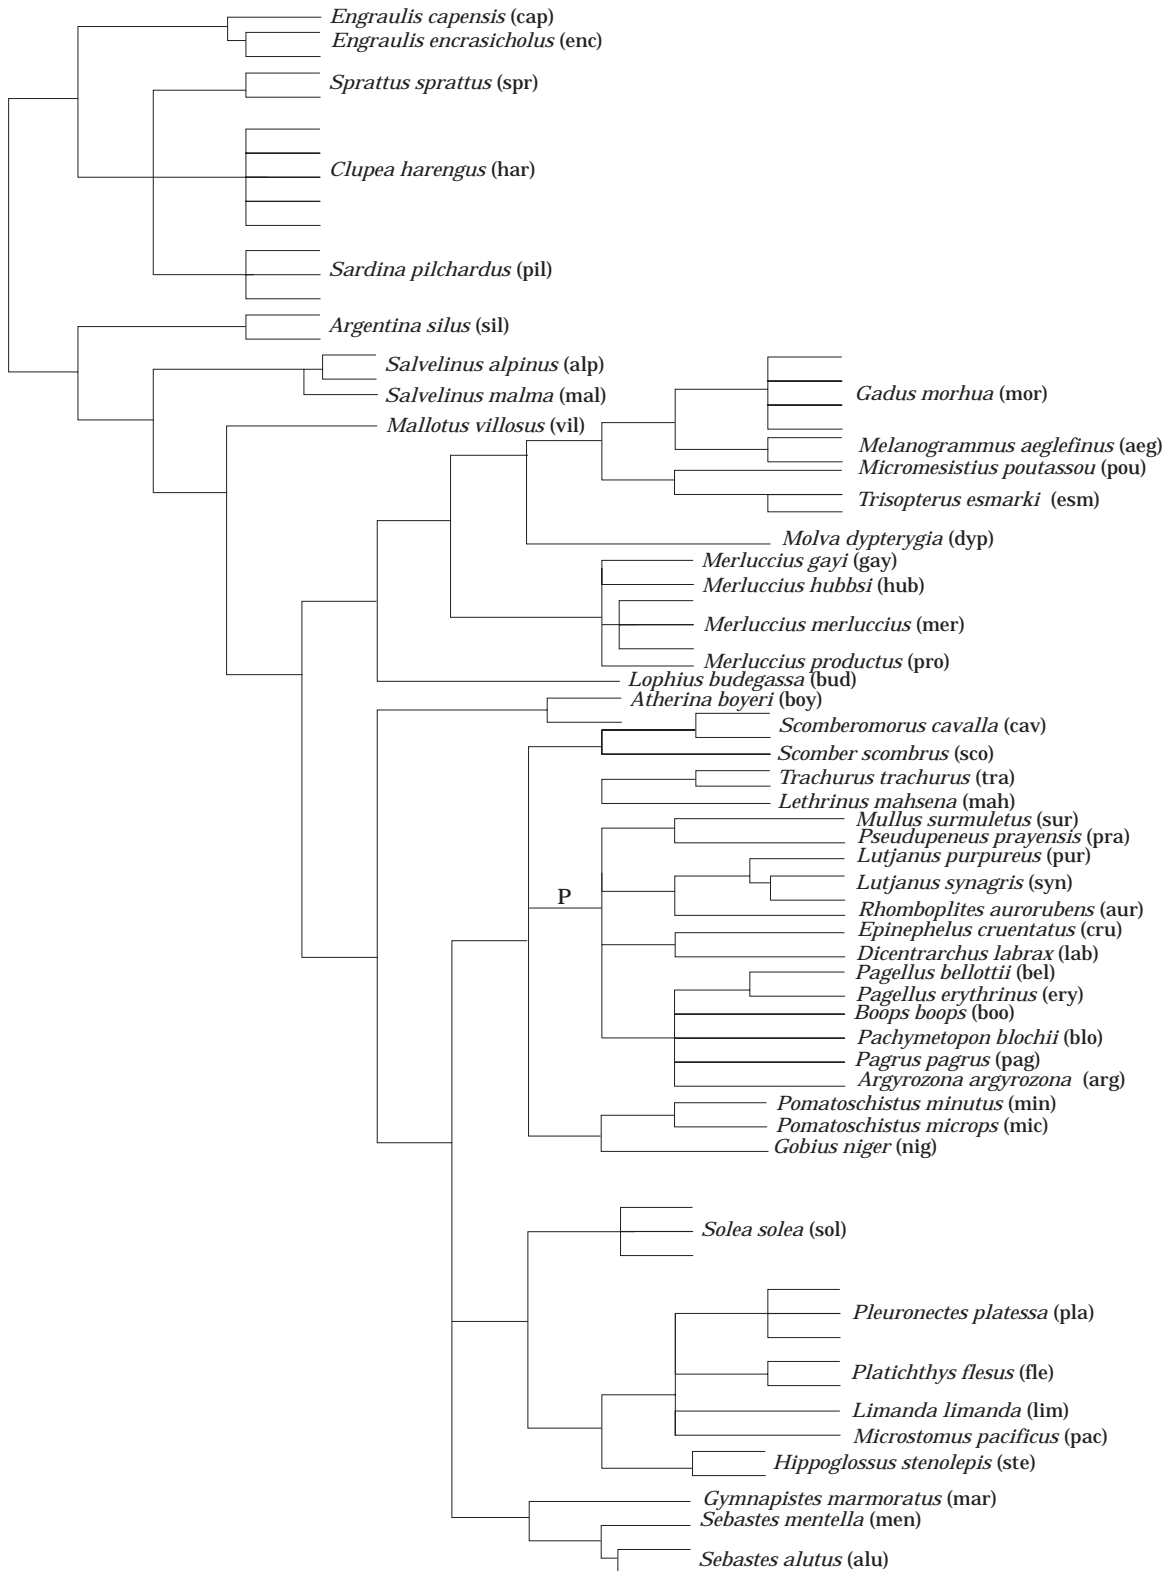

Figure 1. Phylogenetic tree of the sample of teleost fishes analysed. Data from Lecointre (1994, and pers. comm.). The position of taxa along the vertical axis has no phylogenetic meaning. P: Perciforms. In parentheses: species coding for Figure 4.

Table 1. Relationships between the logarithm of demographic trait and the logarithm of length-at-5%-survival ( $L_{0.05}$ ) in 77 populations of fishes: correlation coefficients ( $r$ ), allometric slopes ( $\beta$ )  $\pm$  standard error, and robust allometric slopes ( $\beta_r$ ).

| Demographic trait              | $r$  | $\beta$         | $\beta_r$ |
|--------------------------------|------|-----------------|-----------|
| Age at maturity $A_m$          | 0.73 | $0.71 \pm 0.08$ | 0.72      |
| Length at maturity $L_m$       | 0.97 | $0.93 \pm 0.03$ | 0.89      |
| Time-to-5%-survival $T_{0.05}$ | 0.61 | $0.60 \pm 0.09$ | 0.48      |

available for all populations of our study. Moreover, branch length estimations depend dramatically on the part of the genome used in the analysis, and the criteria to be used in selecting the part of the genome to be analysed are unclear. Therefore, branch lengths were arbitrarily set as follows: branch length=5 from populations to species, 1 from species to genera, and 4 for all other branches (i.e. the distance between two conspecific populations is 10, between two congeneric populations of different species is 12, between two populations of different genera of the same family is 20, etc). Other combinations of arbitrary distances were used in order to test the sensitivity of the results to branch lengths. The sensitivity of the results to incomplete knowledge of the topology of the phylogeny is also checked by comparing the results of Perciforms considered as monophyletic (Fig. 1) or polyphyletic (Fig. 1 with length of branch "P" set to zero).

## Methods

### Allometry

Most life history traits change with body size. Size is a major constraint upon metabolic rates and energy assimilation, and thus affects the entire lives of animals, including growth and reproduction (Reiss, 1989) and survival (Calder, 1985). The analysis of the correlations between several of these traits must take into account the fact that size may act as a confounding variable: two traits may be correlated because each is correlated with size. Comparative studies therefore usually remove size-effects (Harvey and Pagel, 1991).

Size-effects are usually described by the power relationship  $Y = \alpha L^\beta$ , where  $L$  is body size,  $Y$  is any trait varying with size,  $\alpha$  and  $\beta$  are the parameters of the equation. The slope  $\beta$  of the transformed equation  $\ln(Y) = \ln(\alpha) + \beta \ln(L)$  was estimated by least-squares regression for each trait (except the parameter  $b$  of the fecundity-length relationship, which was already scaled for length), with length-at-5%-survival as the scaling variable. A fair agreement (Table 1) was found between the values of slopes and the expected values of 0.75 generally attributed to time variables (e.g. Platt and Silvert, 1981; Calder, 1985; Brown *et al.*, 1993), and of 1

for length at maturity. The estimated values were then used for removing the part of variation of each trait related to body size: subsequent analyses were performed on size-corrected traits (i.e. on  $\ln(A_m) - 0.71 \ln(L_{0.05})$ ;  $\ln(L_m) - 0.93 \ln(L_{0.05})$ ;  $\ln(T_{0.05}) - 0.60 \ln(L_{0.05})$ ), and results are discussed relative to body size.

### Removing phylogenetic correlation

In the framework of evolutionary ecology, many comparative methods have been developed. They allow one to test hypotheses by comparing the attributes of many species. *Ad hoc* methods are needed because species are not statistically independent, but share a common history through their phylogeny: they evolved from common ancestors (e.g. Harvey and Pagel, 1991; Stearns, 1992). I shift this approach by one step and compare populations instead of species. Doing so, I intend to separate phylogenetic and long-term evolved effects from short-term and local effects, which should be influenced by the present environment, especially fishing.

Among the different comparative methods available, we cannot use those derived from Felsenstein's method of pairwise independent comparisons or contrasts (Felsenstein, 1985; Garland *et al.*, 1992; Purvis and Rambaut, 1995) because these methods require the reconstruction of higher node (ancestors) traits, usually by averaging traits of descendants. In the case of exploited fish populations, we know that the influence of fishing on the mortality of populations has increased with time. Therefore we are not allowed to reconstruct past traits on the basis of simple assumptions. For the same reason, we cannot use nested ANOVA or similar methods, which estimate mean traits of higher taxonomic levels (Stearns, 1983; Harvey and Clutton-Brock, 1985; Bell, 1989). We use the so-called phylogenetic autocorrelation method, developed by Cheverud *et al.* (1985) and Gittleman and Kot (1990); the explanations below are mainly based on the latter paper. This method allows one to partition the phenotypic value of a trait into a phylogenetic component (reflecting common evolution) and a population component (environment-dependent). The method is based on phylogenetic distance (in a cladogram or phylogenetic tree) and spatial autocorrelation statistics, which measure effects that vary with distance.

- Moran's I statistic is an autocorrelation coefficient that measures the extent to which each observation resembles that of its neighbours. It is used to answer the question: Are there phylogenetic effects?
- This autocorrelation can be evaluated at different levels and brought together into so-called "phylogenetic correlograms" to determine the taxonomic level at which phylogenetic correlation occurs. Here I computed Moran's I to measure autocorrelation

between populations within species, between species within families, and between families within orders; these levels are dictated by the composition of the data set.

- Finally the method allows one to remove phylogenetic correlation by means of an autoregressive model, which takes the form  $Y = \rho WY + \varepsilon$ , where  $Y$  is a vector of observed trait values,  $\rho$  is an autocorrelation coefficient,  $W$  is a weighting (neighbouring) matrix, and  $\varepsilon$  are the residuals.  $\rho WY$  estimates the phylogenetic part of the trait, and  $\varepsilon$  the population (environmental) component. The weighting matrix  $W$  is derived from a distance matrix  $D$  describing the relative positions of the populations on a phylogenetic tree by:  $w_{ij} = 1/d_{ij}^\alpha$  (neighbouring between populations  $i$  and  $j$ ).  $\alpha$  is a flexibility parameter that accounts for the levels at which autocorrelation occurs. Large  $\alpha$  values describe reduced influence of distant populations on the estimated trait – consequently higher influence of close neighbours.

A maximum-likelihood procedure is used to estimate the parameters  $\rho$  and  $\alpha$  of the autoregressive model. The ability of the model to remove phylogenetic correlation is checked by  $R^2$ , which estimates the proportion of total variance accounted for by phylogeny, and by a phylogenetic correlogram of the residuals (which should not be significant).

### Multivariate analysis

Whereas the above fits were performed for each trait separately, we analyse the residuals together by means of a principal component analysis (PCA; Lebart *et al.*, 1984). PCA is performed on the correlation matrix of size-corrected and phylogeny-corrected traits to quantify the residual covariations of life-history traits: the relationships between their environmental component, which variations are assumed to be mainly due to fishing.

## Results

### Phylogenetic autoregression

All five of the traits in our study show phylogenetic autocorrelation at some level (Table 2). Length-at-5%-survival is the most autocorrelated trait, and also the only one with significant autocorrelation between families within orders. On the other hand, length at maturity is weakly autocorrelated: most of the variance is explained by size (Table 1) and its residual variance may be mostly explained by population factors.

We used autoregressive models to partition each demographic trait into a phylogenetic and a population component (Table 3).  $\alpha$  estimates vary from 1.3 to 4.3, reflecting the levels at which most autocorrelation

Table 2. Phylogenetic correlograms, enumerating normalized Moran's  $I$  for each trait (to be interpreted as correlation coefficients). \*:  $0.05 < p < 0.01$ ; \*\*:  $0.01 < p < 0.001$ ; \*\*\*:  $p < 0.001$ ; otherwise  $p > 0.05$ .  $A_m$ : age at maturity;  $F_b$ : parameter  $b$  of the fecundity-length relationship;  $L_m$ : length at maturity;  $L_{0.05}$ : length-at-5%-survival;  $T_{0.05}$ : time-to-5%-survival.

| Taxonomic rank | $A_m$   | $L_m$ | $L_{0.05}$ | $F_b$   | $T_{0.05}$ |
|----------------|---------|-------|------------|---------|------------|
| Species        | 0.60*** | 0.05  | 0.74***    | 0.33**  | 0.49***    |
| Family         | 0.31*** | 0.11  | 0.44***    | 0.27*** | 0.22**     |
| Order          | 0.08*   | 0.03  | 0.15***    | 0.03    | -0.11      |

Table 3. Autoregressive model: maximum likelihood estimates of the model's parameters  $\alpha$  (distance exponent) and  $\rho$  (autocorrelation coefficient), and  $R^2$ -statistic (proportion of total variance accounted for by phylogeny) for each trait.

|          | $A_m$ | $L_m$ | $L_{0.05}$ | $F_b$ | $T_{0.05}$ |
|----------|-------|-------|------------|-------|------------|
| $\alpha$ | 3.1   | 1.3   | 4.3        | 2.1   | 2.4        |
| $\rho$   | 0.965 | 0.827 | 0.977      | 0.980 | 0.912      |
| $R^2$    | 0.36  | 0.01  | 0.73       | 0.09  | 0.17       |

occurs. The variance accounted for by phylogeny is quite variable, ranging from less than 10% in length at maturity and the parameter  $b$  of fecundity to more than 70% for length-at-5%-survival (Fig. 2). In order to check if the model removes all phylogenetic correlation, we computed the phylogenetic correlograms for the population components of each trait (Table 4). All autocorrelation coefficients become non-significant, demonstrating the ability of the model to remove phylogenetic correlation.

### Multivariate analysis

Correlation matrices of size-corrected demographic traits and of their phylogenetic and population parts show different patterns of correlation (Table 5). Spearman's rank correlations were estimated because the distribution of the residuals is unknown: most of the observed correlations are robust, especially the ones discussed below (Table 6). Interestingly, more correlation coefficients are significant in the phylogenetic components matrix than in the size-corrected traits matrix (Table 5: five significant correlation coefficients in phylogenetic components, two in unpartitioned traits). Moreover, two of these correlation coefficients have opposite signs in the phylogenetic and population components (Table 6:  $r(L_m, T_{0.05}) > 0$  for the phylogenetic component,  $< 0$  for the population component;  $r(F_b, L_{0.05}) < 0$  for the phylogenetic component,  $> 0$  for the population component): in the phylogenetic component



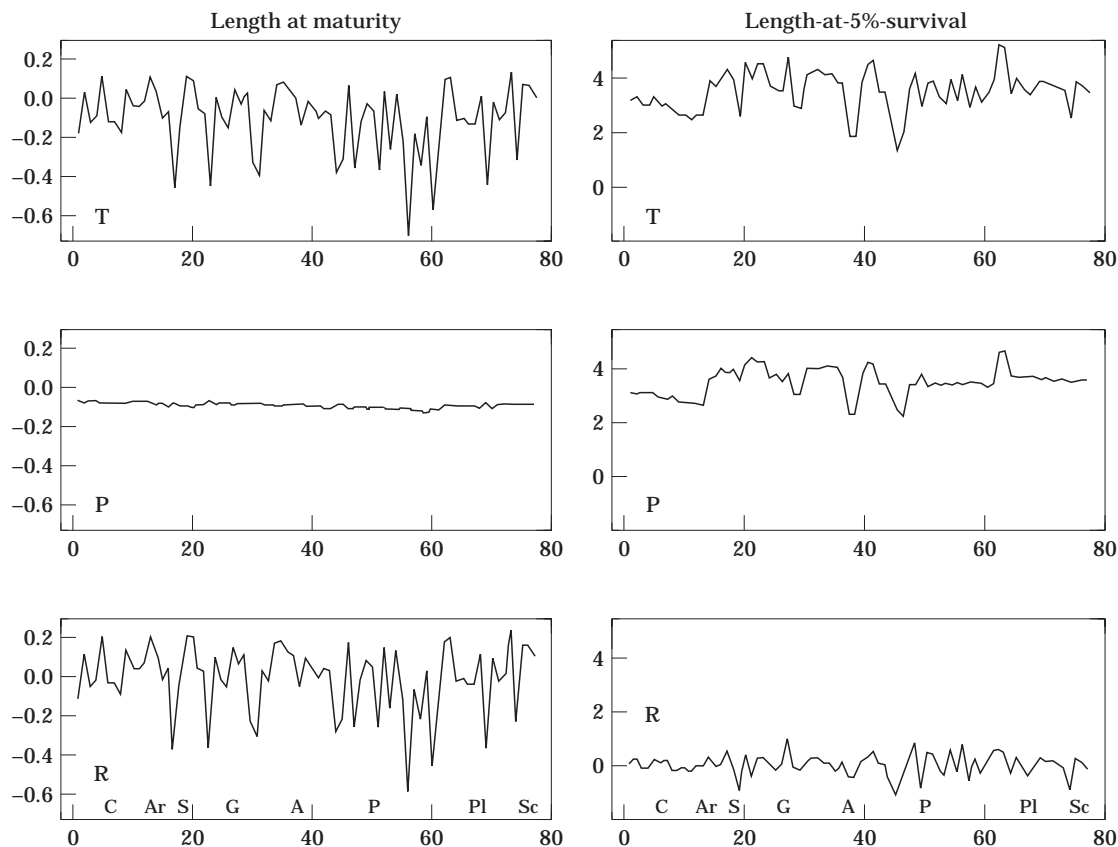

Figure 2. The trait vector (T) and its phylogenetic (P) and residual (R) components. (Left) Plot of size-corrected length at maturity for 77 populations of teleost fishes from the orders Clupeiformes, Argentiniformes, Salmoniformes, Gadiformes, Atheriniformes, Perciformes, Pleuronectiformes, and Scorpaeniformes, and its partition into phylogenetic and population components. (Right) Same decomposition for length-at-5%-survival. The abscissa is ordered from the most ancestral to the most derived taxon used in the analysis.

of the traits, short life is associated with small size and early age at maturity.

Principal component analysis of the population parts of these traits exhibits the positive correlation of time-to-5%-survival with age at maturity, and its negative correlation with length at maturity (1st axis); and a positive link between length at maturity and the parameter  $b$  of fecundity (2nd axis; Fig. 3). Time-to-5%-survival is the variable with the highest contribution to

the structure of the analysis (with the highest loading for the first component: 12.7% of total variability). On the other hand, length at maturity and its positive link with  $F_b$  appear on the orthogonal second component, although their correlation coefficient is not significant because of non-linearity. This may be interpreted as a phenotypic trade-off between length-at-maturity and the slope of the fecundity-length relationship: individual fecundity in populations with a large size at maturity would potentially increase steeply with length, and conversely; this trade-off seems independent of time-to-5%-survival, and also of fishing.

On the plot of the populations' first two components (Fig. 4a), populations of all taxa appear mingled and not sorted by taxa: as the method removes the phylogenetic part of the variation, the residuals are free of this constraint. In order to display the effect of fishing on the patterns in life history, I plotted the first two components together with an expanding symbol proportional to the ratio of fishing mortality to natural mortality

Table 4. Phylogenetic correlograms, enumerating normalized Moran's  $I$  for the population component of each trait. All autocorrelation coefficients are insignificant at the 0.05 level.

| Taxonomic rank | $A_m$ | $L_m$ | $L_{0.05}$ | $F_b$ | $T_{0.05}$ |
|----------------|-------|-------|------------|-------|------------|
| Species        | 0.13  | 0.00  | 0.08       | 0.08  | 0.15       |
| Family         | 0.03  | 0.03  | 0.06       | 0.12  | 0.01       |
| Order          | 0.03  | -0.01 | -0.05      | 0.00  | -0.06      |

Table 5. Correlation matrices of (a) size-corrected demographic traits; (b) their phylogenetic components; (c) their population components. Only significant correlation coefficients at the 0.05 level are shown.

| (a) Demographic traits | A <sub>m</sub> | L <sub>m</sub> | L <sub>0.05</sub> | F <sub>b</sub> |
|------------------------|----------------|----------------|-------------------|----------------|
| L <sub>m</sub>         |                | 1              |                   |                |
| L <sub>0.05</sub>      |                |                | 1                 |                |
| F <sub>b</sub>         |                |                |                   | 1              |
| T <sub>0.05</sub>      | 0.51           | -0.24          |                   |                |

  

| (b) Phylogenetic components | A <sub>m</sub> | L <sub>m</sub> | L <sub>0.05</sub> | F <sub>b</sub> |
|-----------------------------|----------------|----------------|-------------------|----------------|
| L <sub>m</sub>              |                | 1              |                   |                |
| L <sub>0.05</sub>           |                |                | 1                 |                |
| F <sub>b</sub>              | 0.21           |                | -0.32             | 1              |
| T <sub>0.05</sub>           | 0.67           |                | -0.34             | 0.25           |

  

| (c) Population components | A <sub>m</sub> | L <sub>m</sub> | L <sub>0.05</sub> | F <sub>b</sub> |
|---------------------------|----------------|----------------|-------------------|----------------|
| L <sub>m</sub>            |                | 1              |                   |                |
| L <sub>0.05</sub>         |                |                | 1                 |                |
| F <sub>b</sub>            |                |                | 0.24              | 1              |
| T <sub>0.05</sub>         | 0.36           | -0.31          |                   |                |

Table 6. Spearman's rank correlation matrices of (a) size-corrected demographic traits; (b) their phylogenetic components; (c) their population components. Only significant correlation coefficients at the 0.05 level are shown.

| (a) Demographic traits | A <sub>m</sub> | L <sub>m</sub> | L <sub>0.05</sub> | F <sub>b</sub> |
|------------------------|----------------|----------------|-------------------|----------------|
| L <sub>m</sub>         |                | 1              |                   |                |
| L <sub>0.05</sub>      |                |                | 1                 |                |
| F <sub>b</sub>         |                |                |                   | 1              |
| T <sub>0.05</sub>      | 0.54           |                |                   |                |

  

| (b) Phylogenetic components | A <sub>m</sub> | L <sub>m</sub> | L <sub>0.05</sub> | F <sub>b</sub> |
|-----------------------------|----------------|----------------|-------------------|----------------|
| L <sub>m</sub>              | 0.22           | 1              |                   |                |
| L <sub>0.05</sub>           |                |                | 1                 |                |
| F <sub>b</sub>              |                |                | -0.42             | 1              |
| T <sub>0.05</sub>           | 0.66           | 0.28           | -0.30             |                |

  

| (c) Population components | A <sub>m</sub> | L <sub>m</sub> | L <sub>0.05</sub> | F <sub>b</sub> |
|---------------------------|----------------|----------------|-------------------|----------------|
| L <sub>m</sub>            |                | 1              |                   |                |
| L <sub>0.05</sub>         |                |                | 1                 |                |
| F <sub>b</sub>            |                |                | 0.23              | 1              |
| T <sub>0.05</sub>         | 0.38           | -0.29          |                   |                |

(Fig. 4b). As fishing and natural mortality are difficult to estimate, the ratio was converted into four categories. Although most of these figures are not perfectly reliable, their overall distribution is consistent with the assumption that variation in the population component of

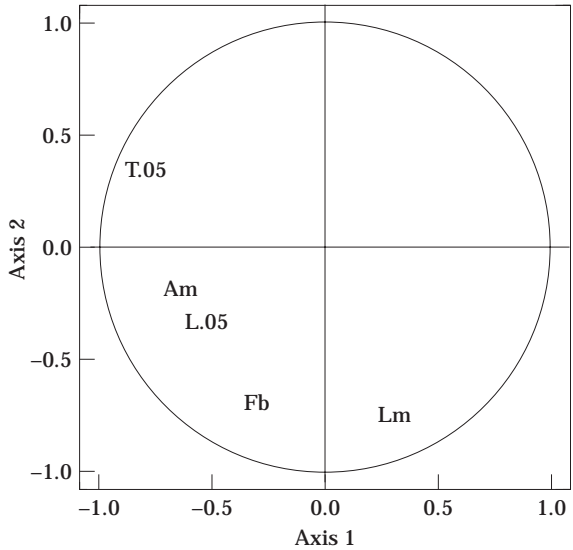

Figure 3. Scaled principal component analysis of the population parts of five demographic traits: plot of the original variables on the first two principal axes. The first two axes account for 56% of total variance: A<sub>m</sub>: age at maturity; F<sub>b</sub>: parameter b of the fecundity-length relationship; L<sub>m</sub>: length at maturity; L<sub>0.05</sub>: length-at-5%-survival; T<sub>0.05</sub>: time-to-5%-survival.

time-to-5%-survival is mainly due to fishing. The first component shows a gradient from unexploited stocks with delayed maturity at a small size (e.g. unexploited char of Baffin Island alpO7 and South African Sparidae argA6 and bloA6, left) to short-lived stocks with precocious maturity at a large size (e.g. Mediterranean goby minM8, West African red mullet praA7, Cuban snapper synO7, right). The case of North Sea plaice is of special interest: in the forties, after fishing was interrupted during Second World War, the population has the mortality and maturity traits of an unexploited population (plaN4). In the 1970s, the population is among other exploited populations (plaN7).

Sensitivity analyses

Autoregressive models were fit to the data with different branch lengths: (i) as described previously; (ii) all branches=1; (iii) branch length=1 from populations to species and from species to genera, and 4 for all other branches. Estimates of  $\alpha$  consistently increase as the species-population distance increases, whereas  $\rho$  estimates and the proportion of total variance accounted for by phylogeny remain constant. The ability of the model to remove phylogenetic correlation is slightly better with set (i): all autocorrelation coefficients become non-significant, whereas L<sub>0.05</sub> autocorrelation remains significant at the family level with sets (ii) and (iii). As the results of the subsequent multivariate analysis

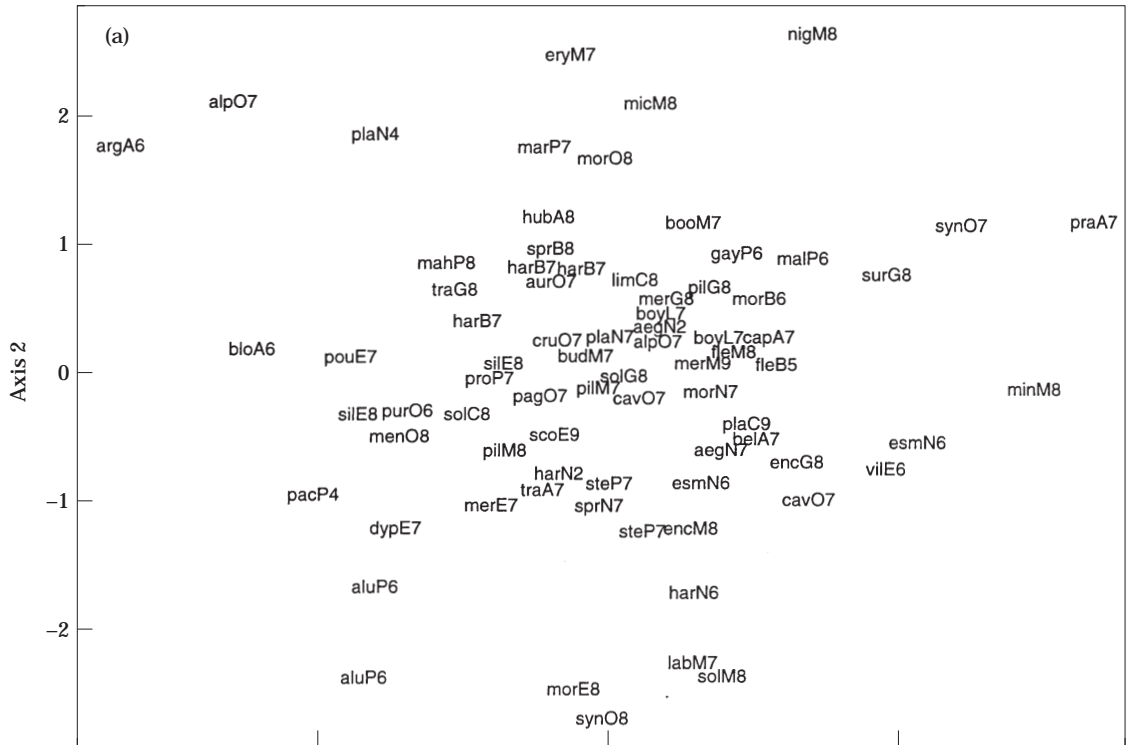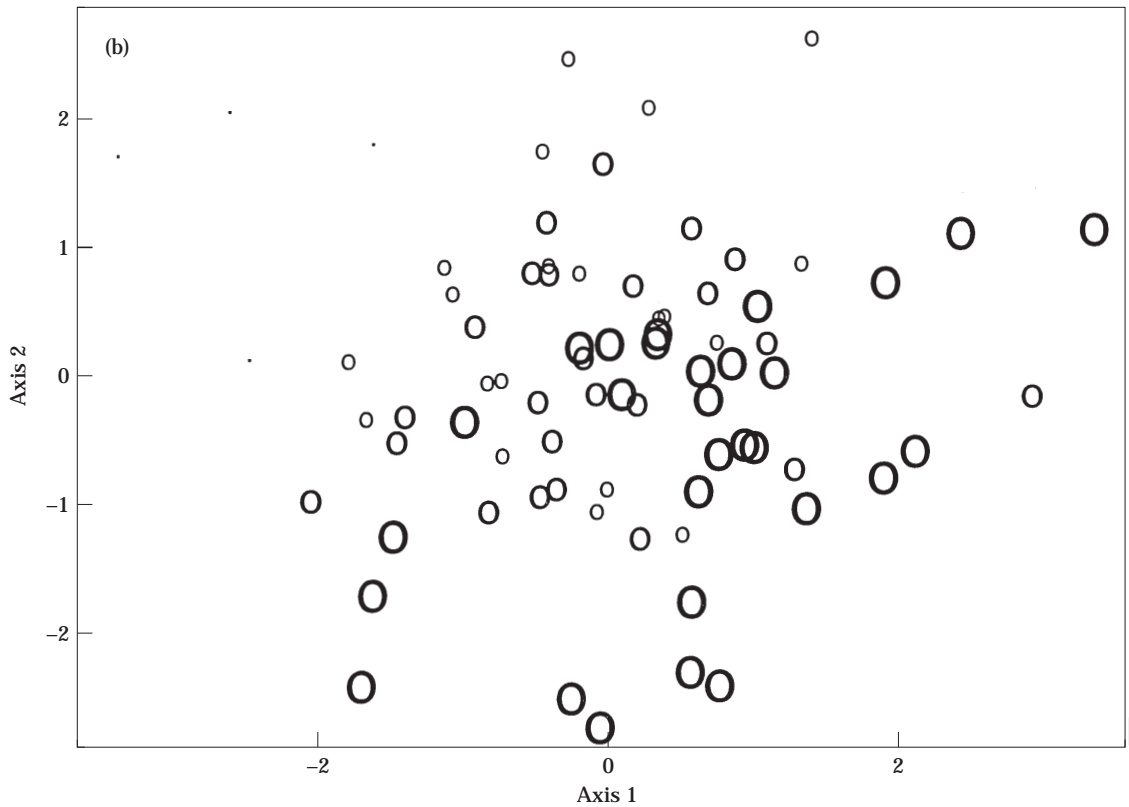

Figure 4.



did not differ significantly, set (i) was used in further computations.

A bias may arise in the results because cod populations used in the study are all under high fishing pressure. Because of the difficulty of finding data on weakly exploited stocks of cod, the influence of the species on final results was checked by comparing the results with and without cod. Autocorrelation and autoregression coefficients are similar; some correlation coefficients of the model and residual matrices become insignificant, but the ones discussed here are robust. The same kind of result is obtained when removing all Gadidae with a short time-to-5%-survival.

Comparing the results of considering Perciforms as polyphyletic or monophyletic shows that the results of the analysis are not sensitive to this uncertainty in the topology of the phylogenetic tree.

## Discussion

### Autoregressive method

The autoregression method proves able to remove most of phylogenetic autocorrelation. Whereas the partition into phylogenetic and population components was performed on each trait independently, there remains significant correlations in the population components matrix (Table 5). This argues for the ability of the model to separate components which reflect actual parts of the variability. Moreover, more correlation coefficients are significant in the phylogenetic and population components than in the original size-corrected traits: the method seems able to make visible patterns that were concealed in the original data.

I used Gittleman and Kot's method (1990) as suggested in their conclusion: I correlated the residual components of several traits together, and tested these correlations independently of confounding phylogenetic correlations. As these authors have pointed out, their method is appropriate only if there is sufficient genetic variation in the traits. Although life history traits have lower heritabilities than morphological or behavioural traits, their heritabilities are significantly greater than zero (Stearns, 1992). Moreover, there is plenty of genetic variation for life-history traits in natural populations. Therefore it seemed appropriate to apply the autoregression method at the population level, in order to

take into account intraspecific variation in interspecific comparisons.

### Phylogenetic information and sampling

Phylogenetic information to be used in comparative studies should be as complete and accurate as possible (Harvey and Pagel, 1991). The phylogenetic autocorrelation method may result in type I errors when the topology of the phylogeny is known very incompletely (Purvis *et al.*, 1994). In the case of teleost fishes, the topology of the tree is well known, except the Perciform branch (Lecointre, 1994), but the results of our study are not sensitive to this uncertainty.

A good knowledge of branch lengths is also required but seldom available (Harvey and Pagel, 1991). Branch lengths elaborated on a common basis are unavailable for the sample of populations used here. But the phylogenetic autoregression method is not the most sensitive to incorrect branch lengths (Purvis *et al.*, 1994) because the parameter  $\alpha$  introduces flexibility with regard to distances. The study is representative only of the mostly commercial stocks used in the sample and not of all teleost fishes. This is because sampling was constrained by the availability of data, and it was not possible to obtain a good sampling across phylogeny: many taxa are lacking and represented taxa are not given an equal weight.

Another sampling difficulty arises from the fact that different populations of one species are often exploited with a similar intensity; an extreme case is cod, which has only highly exploited populations. Ideally the study should involve together exploited and unexploited populations of each species, because the autocorrelation method will ascribe to phylogeny the common features of conspecifics. Nevertheless, the low  $\alpha$  value estimated for time-to-5%-survival (2.4) indicates that distant populations still have some weight in predicting this trait: conspecifics are not the only populations taken into account in estimating time-to-5%-survival of a given population.

### The population component

With regard to the population component, long-lived populations appear to have a small size at maturity at a late age, whereas high adult mortality is associated with

Figure 4. (a) Scaled principal component analysis of the population parts of five demographic traits: the first two principal components of populations. Coding of the populations: first three letters=species name (see Fig. 1); capital letter=location (A: South Atlantic. B: Baltic Sea. C: Channel and Celtic Sea. E: North East Atlantic. G: Bay of Biscay. I: Indian Ocean. M: Mediterranean. N: North Sea. O: West Atlantic. P: Pacific Ocean); number=decade of the XXth century (e.g. 6 means during the sixties). (b) Same figure with an expanding symbol proportional to the ratio of fishing mortality to natural mortality for each population (dots: no fishing mortality. Small circles:  $0 < F/M \leq 1$ . Intermediate circles:  $1 < F/M \leq 2$ . Large circles:  $F/M > 2$ ).

Table 7. Changes in size at maturity in various exploited populations (length at which 50% of the individuals reach maturity).

| Reference               | Species          | Location       | Period    | Sex | Size at maturity (cm)<br>at beginning and<br>end of period | Change in<br>size at age |
|-------------------------|------------------|----------------|-----------|-----|------------------------------------------------------------|--------------------------|
| Pitt (1975)             | American plaice  | ICNAF Div. 3L  | 1961–1972 | F   | 41.5–41.1                                                  | Increased                |
|                         |                  | ICNAF Div. 3N  | 1957–1971 | M   | 25.5–26.0                                                  | Increased                |
| de Veen (1976)          | Sole             | North Sea      | 1957–1973 | F   | 43.7–42.8                                                  | Increased                |
|                         |                  |                |           | M   | 25.5–25.3                                                  | Increased                |
| Bowering (1989)         | Witch flounder   | Newfoundland   | 1950–1986 | F   | 27.5–30.0                                                  | Increased                |
| Rijnsdorp (1989)        | North Sea plaice | Dogger         | 1904–1986 | F   | 46.0–43.0                                                  | Increased                |
|                         |                  |                |           | M   | 41.0–35.0                                                  | Increased                |
| Beacham (1983)          | Cod              | Southern Bight | 1959–1979 | F   | 35.0–24.0                                                  | Increased                |
|                         |                  | Scotian Shelf  |           | F   | 34.0–30.0                                                  | Increased                |
| Hempel (1978)           | Cod              | North Sea      | 1920–1970 | F   | 64.0–43.0                                                  | No change                |
|                         |                  |                |           | M   | 61.0–44.0                                                  | No change                |
| Rowell (1993)           | Cod              | North Sea      | 1893–1974 | F   | 75.0–60.0                                                  | No change                |
|                         |                  |                |           | M   | 65.0–50.0                                                  | No change                |
| Clark and Tracey (1994) | Orange roughy    | New Zealand    | 1984–1990 | F   | 75.0–61.0                                                  | No change                |
|                         |                  |                |           | M   | 73.0–54.0                                                  | No change                |
|                         |                  |                |           | F   | 27.1–22.3                                                  | Not available            |
|                         |                  |                |           | M   | 25.7–24.5                                                  | Not available            |

early maturity at a large size. The shift of North Sea plaice in this trade-off when exploited or not, is an argument for an environmental component of the variability of these traits. Time-to-5%-survival is the most contributing variable to the structure of this environmental component; the exploitation level is associated with this structure (Fig. 4b). Both arguments indicate that fishing would be an important aspect of this environment. These short-term environmental effects are of larger magnitude than phylogenetic components, as evidenced by the proportion of total variance accounted for by phylogeny for age and size at maturity and time-to-5%-survival (Table 3). I interpret these short-term environmental effects as the expression of the phenotypic plasticity of growth and maturation in fishes. Phenotypic plasticity was defined by Schmaulhausen (1949) as the ability of a genotype to express various phenotypes across an environmental gradient. Although phenotypic plasticity of growth has been commonly observed, especially density-dependent growth (e.g. Beverton and Holt, 1957; Hubold, 1978; Ross and Almeida, 1986; Overholtz, 1989), in my results it appears mainly in the variations of size and age at maturity, because I worked relative to size by removing size effects.

These results show a good agreement with available experimental evidence. Alm (1959) reports that in some experiments with brook trout, size at maturity increases and age at maturity decreases as growth rate increases. Reznick (1993) showed by a series of experiments on guppies that increased resource availability (which may be *in natura* a consequence of fishing, which reduces population densities) causes an increase in the size at maturity and a decrease in the age at maturity. Another

experiment by Belk (1995) on bluegill sunfish shows that the variance in growth patterns and age and size at maturity observed between populations apparently resulted mostly from environmental differences, not from genetic variation; and that observed patterns of variation between populations are best explained by effects of differences in predator populations.

Many observations of maturity changes under fishing pressure in natural populations have been reported. Age at maturity has been observed to decrease under exploitation in Grand Bank American plaice (Pitt, 1975), in Scotian Shelf cod (Beacham, 1983), in halibut caught in Northern Norway (Haug and Tjemsland, 1986), in North-east Arctic cod (Jørgensen, 1990) and in North Sea plaice (Rijnsdorp, 1989). Trippel (1995) compiled data for 8 cod stocks and 4 haddock stocks of the North-west Atlantic, and 11 other fish populations: in all but one age at maturity of both males and females declined under exploitation, as much as 1 to 3 years or more. Age at maturity was much higher in the unexploited cod of Ogac Lake than in any of the neighbouring exploited stocks (Patriquin, 1967). Also age at maturity decreased as stock biomass decreased (indirect effect of fishing) in North Sea herring (Hubold, 1978), North Sea cod (Hempel, 1978) and Grand Bank cod (Xu *et al.*, 1993).

The negative association between longevity and size at maturity is more unexpected. This finding is in accordance with experimental evidence (Alm, 1959; Reznick, 1993) and with theoretical predictions (Stearns and Koella, 1986; Hutchings, 1993). However, most of the published studies based on field data conclude that length at maturity decreases or remains stable under fishing pressure (Table 7). Most of these changes are of

low magnitude. Still we have to explain this discrepancy. Comparing results on size at maturity is difficult for two reasons. (i) I corrected size at maturity by adult size, whereas other studies did not. Exploitation removes large individuals and hence reduces the mean size of fish in the population. As  $L_{0.05}$  decreases,  $\ln(L_m) - 0.93 \ln(L_{0.05})$  may increase if the variation in  $L_m$  is low. However, correction by size is necessary because otherwise size would act as a confounding variable, and in order to take into account, when comparing size at maturity, the concomitant changes in length at age and in the mean size of the population. Moreover, from a theoretical point of view, the dimensionless number  $L_m/L_\infty$  was considered useful in looking for life history generalization (Charnov and Berrigan, 1991). Beverton (1963) and Beverton (1992) used this number in comparative studies and concluded that it tends to be constant within taxa. I also find that adult size explains the most part of length at maturity (94%: Table 1), but I seek to interpret the remaining variation. (ii) The second difficulty arises from the fact that most of published studies of Table 7 consider relatively long series (20 years or more): in these observations long-term effects of fishing may be entangled with short-term plasticity we are dealing with. For age at maturity long-term and short-term effects act in the same direction, but this is not the case for length at maturity (Table 6; Reznick, 1993). This is an advantage of large comparative studies such as ours, which allow one to disentangle long-term and short-term effects.

Another interesting observation, although not directly related to fishing effect, is the positive correlation between the slope of the fecundity-length relationship and  $L_{0.05}$ : populations with a larger size have a higher fecundity-length slope than populations with a smaller size (Tables 5 and 6). This pattern is not apparent on Figure 3 but on the fourth axis of the PCA (not shown). The slope of the fecundity-length relationship is also positively associated with size at maturity (Fig. 3). These patterns may be interpreted in terms of phenotypic trade-offs. In fish the widespread trade-off between current and future reproduction (Stearns, 1992) appears in the strong negative correlation between the parameters  $a$  and  $b$  of the fecundity-length relationship  $F = aL^b$  (from my data set:  $r(a,b) = -0.85$ , and  $-0.88$  when corrected for size effects): the lower fecundity is at maturity, the steeper it can increase later. After maturity the surplus power, i.e. the fraction of ingested energy remaining after an individual has paid metabolic costs, is to be shared between growth and reproduction (Ware, 1984). We may hypothesize that if fecundity is high at maturity, a lower part of the surplus power remains for growth, and that consequently fish reach a smaller size. This phenotypic trade-off would be consistent with the one observed by Jennings and Beverton (1991) in a comparative study of life history traits of nine stocks of

Atlantic herring: a low annual reproductive output is associated with late maturity and slow post-maturational growth towards a large maximum size (and vice versa).

### Theoretical aspects and mechanisms of the plasticity of size and age at maturity

Several theoretical models have been developed to predict the reaction-norm of size and age at maturity in fishes, with different assumptions on the constraints that will act on the reaction-norm (Stearns and Crandall, 1984; Stearns and Koella, 1986; Perrin and Rubin, 1990; Roff, 1992). These models may not be suitable for exploited populations, because they assume a stable age distribution (Stearns and Crandall, 1984). Some of these models predict dome-shaped norms of reaction for size-to-age at maturity in fishes, which fit Alm's (1959) observations. Stearns and Crandall (1984) show that other shapes of these norms of reaction are plausible under different assumptions. The difficulty in interpreting these conclusions is that a high adult mortality is usually not taken into account as a constraint that may act directly or indirectly on this reaction-norm. Hutchings (1993) constructed reaction-norms by determining how optimal age and size at first reproduction varied with growth rate in two unexploited brook trout populations. Harvesting might result in decreased juvenile density and in increased growth rate; optimal size at maturity increases with growth rate in one population and varies little in the other population, whereas optimal age at maturity declines as growth rate increases in both cases. Moreover, size selective mortality might change the slope of the reaction norm.

How adult mortality due to fishing may act on growth and maturation processes is not clear. The main hypothesis is that fishing decreases the population's density, that growth would be density-dependent, and that the norm of reaction for size-to-age at maturity would be constrained by growth. Evidence of density-dependent growth is abundant in various populations of distantly related taxa (e.g. Beverton and Holt, 1957; Hubold, 1978; Ross and Almeida, 1986; Overholtz, 1989). Growth-dependent plasticity of size and age at maturity was also demonstrated by experimental evidence (Alm, 1959; Reznick, 1993; Belk, 1995) and by field data on lake whitefish (Jensen, 1981). However, other mechanisms may act, for example Rijnsdorp *et al.* (1991), in an extensive study of the variations of growth, maturation and fecundity in several North Sea stocks, suggested that the observed compensation in total egg production may be due to effects of reproductive variability related to the age composition of the spawning population, rather than to density-dependent effects.

Other possible phenotypic effects of high adult mortality may be mediated by maternal effects, defined by

Bernardo (1996) as direct effects of a parent's phenotype on the phenotype of its offspring. Maternal effects appear as a kind of cross-generation phenotypic plasticity, and may affect many demographic traits, including offspring growth and recruitment. Maternal effects are largely documented in mammals, birds, salamanders, lizards, and plants (Bernardo, 1996). Reznick *et al.* (1996) demonstrated experimentally that food availability to mother Poeciliid fishes affects the size of young. Chambers and Leggett (1996) use comparative methods to show that egg size is likely to be significantly modulated by the maternal environment during oogenesis in marine teleost populations; differences in egg size may be propagated through growth into variation in sizes of larvae, juveniles and even adult fishes. Investigating the timing of short-term fishing effects would allow to assess the importance of maternal effects in the observed phenotypic plasticity.

### Phylogeny of phenotypic plasticity

This paper concentrates on the population component of teleost life history traits, and investigates fishing effects on life history tactics. The complementary component of these traits, namely the phylogenetic component, is worth investigating in detail. This would give more basic insights into teleost demographic strategies, which are the range of flexible tactics a species may deploy, depending on the environment (Wootton, 1984). This would allow a re-examination of the conclusions of pioneering works about this subject by Beverton and Holt (1959), Beverton (1963), Adams (1980) and Roff (1984), who did not address the problem of separating long-term evolved effects from environmental effects.

This study is based on the hypothesis that the phenotypic part of the answer to fishing would be the same in all taxa of teleost fishes: this phenotypic answer is indeed the residual variation of traits, once the resemblance of phylogenetically close populations has been removed. Hence this work will only reveal the general features of this plasticity throughout our sample of teleost fishes. But it seems plausible that different taxa would have evolved different plasticity patterns in response to a given stress. Table 7 suggests that average size at age increases under fishing pressure in Pleuronectiformes, but remains unchanged in cod. Also Rijnsdorp *et al.* (1991) show that compensation for fishing by enhanced reproductive output appears in three North Sea stocks by three different mechanisms (earlier maturation in plaice, enhanced growth in sole and increased fecundity in cod). Their study has the disadvantage of long-term and short-term effects being entangled (30 years series analysed), and this is a common feature to most studies of fishing effects. There is a need for investigating the differences in short-term responses to fishing in different teleost taxa.

Another criticism that may be addressed to this study is that life-history traits are co-evolved: there are linkages between traits, that constrain the simultaneous evolution of two or more traits (Stearns, 1992). Here we investigate phylogenetic autocorrelation trait by trait, and hence leave co-evolution out of account. This is a general gap in comparative methods, most of which consider the variations of no more than two traits (Harvey and Pagel, 1991); for example, Gittleman (1986) and Read and Harvey (1989) successively investigated the covariations of many pairs of life history traits. A multivariate method that would test for differences in the relationships between several traits, independently of phylogenetic correlation, would be an important advance in this field.

### The effects of fishing and fisheries management

Fishing has three types of effects on fish population dynamics: direct effects on population density and on the mean size of individuals; short-term environmental effects on growth and reproduction, mediated by phenotypic plasticity and density-dependent mechanisms; and long-term effects due to the selective pressure imposed by harvesting. Whereas the problems raised by the first type of effects are commonly addressed by fisheries assessment models and management policies, the other two types of effects are seldom considered.

This is partly because these effects are difficult to separate, and may be contradictory. In the phylogenetic component of our traits, short life is associated with a small size and an early age at maturity; this result is in agreement with Reznick (1993) who showed experimentally that, in the longer term, increased adult mortality selects for earlier maturity at a smaller size. Hence we support the conclusion of this author, that compensatory responses of populations to fishing may conceal longer-term selection effects.

Moreover, Nelson (1993) emphasizes that the evolutionary response to selection and its detection depend upon the joint reaction norms of growth and reproduction to changes in density and environmental factors; only when these joint reaction norms have been identified can their evolutionary change be detected. This work is a first step towards this aim: in a rather large sample of teleosts, we document evidence that fishing imposes a phenotypic response in growth and reproduction. It would be worth investigating the shape and genetic variation in the reaction norm. Its influence on exploited population dynamics should be checked: the empirical works of Beverton and Holt (1957) and Overholtz *et al.* (1991) may be given a more basic support in order to develop general models, suitable to various populations.

On the other hand, fishing applies a selective pressure that may shift the long-term selective advantage from a



reproductive pattern to another (Ware, 1984). Further work should use our first results on short-term effects to investigate these changes.

## Summary

This work demonstrates a general trend of the short-term effects of fishing on demographic traits in a large sample of teleost fishes: populations develop compensatory responses to fishing by decreasing their age at maturity and increasing their size at maturity. These effects are of large magnitude and may conceal longer-term selection effects.

These effects should be better analysed and quantified and, if necessary, taken into account in stock assessment and management.

A first consequence of this result is the recommendation that maturity ogives used in stock assessment and projections should be regularly updated.

## Acknowledgements

I thank Dominique Pontier for much stimulating discussion during the course of this work and Jean Boucher and an anonymous referee for valuable comments on previous versions of this paper. I thank Guillaume Lecointre (Laboratoire d'Ichtyologie et Service Commun de Systématique Moléculaire, Muséum National d'Histoire Naturelle, 43 rue Cuvier, 75231 Paris Cedex 05, France) who provided the phylogenetic information. I thank Annick Radenac for help in collating the data, and S. Flatman, L. Motos, N. Perez, J. C. Poulard, and J. A. Tomasini for making their data available to me. Christine Maisonneuve drew the phylogenetic tree. This study was partly supported by the Programme National Dynamique de la Biodiversité et Environnement.

## References

- Adams, P. B. 1980. Life history patterns in marine fishes and their consequences for fisheries management. *Fishery Bulletin of the US Fish and Wildlife*, 78: 1–12.
- Alm, G. 1959. Connection between maturity, size, and age in fishes. Experiments carried out at the Kålarne Fishery Research Station. Institute of Freshwater Research, Drottningholm, Report No. 40: 5–145.
- Beacham, T. D. 1983. Variability in median size and age at sexual maturity of Atlantic Cod, *Gadus morhua*, on the Scotian Shelf in the Northwest Atlantic Ocean. *Fishery Bulletin*, 81: 303–321.
- Belk, M. C. 1995. Variation in growth and age at maturity in bluegill sunfish: genetic or environmental effects? *Journal of Fish Biology*, 47: 237–247.
- Bell, G. 1989. A comparative method. *The American Naturalist*, 133: 553–571.
- Bernardo, J. 1996. Maternal effects in animal ecology. *American Zoologist*, 36: 83–105.
- Beverton, R. J. H. 1963. Maturation, growth and mortality of Clupeid and Engraulid stocks in relation to fishing. *Rapports et Procès Verbaux du Conseil International pour l'Exploration de la Mer*, 154: 44–67.
- Beverton, R. J. H. 1992. Patterns of reproductive strategy parameters in some marine teleost fishes. *Journal of Fish Biology*, 41, Suppl B: 137–160.
- Beverton, R. J. H. and Holt, S. J. 1957. On the dynamics of exploited fish populations. Her Majesty's Stationery Office, London, Fishery Investigations, Series II, 19, 533 pp.
- Beverton, R. J. H. and Holt, S. J. 1959. A review of the life-span and mortality rates in nature, and their relation to growth and other physiological characteristics. *Ciba Foundation Colloquia on Ageing*, 54: 142–180.
- Bowering, W. R. 1989. Witch flounder distribution off Southern Newfoundland, and changes in age, growth, and sexual maturity patterns with commercial exploitation. *Transactions of the American Fisheries Society*, 118: 659–669.
- Brown, J. H., Marquet, P. A., and Taper, M. L. 1993. Evolution of body size: consequences of an energetic definition of fitness. *The American Naturalist*, 142: 573–584.
- Calder, W. A. III. 1985. Size and metabolism in natural systems. In *Ecosystem theory for biological oceanography*, pp. 65–75. Ed. by R. E. Ulanowicz and T. Platt. *Canadian Bulletin of Fisheries and Aquatic Sciences*, 213. 260 pp.
- Chambers, R. C. and Leggett, W. C. 1996. Maternal influences on variation in egg sizes in temperate marine fishes. *American Zoologist*, 36: 180–196.
- Charnov, E. L. and Berrigan, D. 1991. Evolution of life history parameters in animals with indeterminate growth, particularly fish. *Evolutionary Ecology*, 5: 63–68.
- Cheverud, J. M., Dow, M. M., and Leutenegger, W. 1985. The quantitative assessment of phylogenetic constraints in comparative analyses: Sexual dimorphism in body weights among primates. *Evolution*, 39: 1335–1351.
- Clark, M. R. and Tracey, D. M. 1994. Changes in a population of orange roughy, *Hoplostethus atlanticus*, with commercial exploitation on the Challenger Plateau, New Zealand. *Fishery Bulletin*, 92: 236–253.
- de Veen, J. F. 1976. On changes in some biological parameters in the North Sea sole. *Journal du Conseil International pour l'Exploration de la Mer*, 37: 60–90.
- Eschmeyer, W. N. 1990. *Catalog of the genera of recent fishes*. California Academy of Sciences, San Francisco. 698 pp.
- Felsenstein, J. 1985. Phylogenies and the comparative method. *The American Naturalist*, 125: 1–15.
- Gaillard, J. M., Allainé, D., Pontier, D., Yoccoz, N. G., and Promislow, D. E. L. 1994. Senescence in natural populations of mammals: a reanalysis. *Evolution*, 48: 509–516.
- Garland, T. Jr, Harvey, P. H., and Ives, A. R. 1992. Procedures for the analysis of comparative data using phylogenetically independent contrasts. *Systematic Biology*, 41: 18–32.
- Gittleman, J. L. 1986. Carnivore life history patterns: allometric, phylogenetic, and ecological associations. *The American Naturalist*, 127: 744–771.
- Gittleman, J. L. and Kot, M. 1990. Adaptation: statistics and a null model for estimating phylogenetic effects. *Systematic Zoology*, 39: 227–241.
- Gunderson, D. R. and Dygert, P. H. 1988. Reproductive effort as a predictor of natural mortality rate. *Journal du Conseil International pour l'Exploration de la Mer*, 44: 200–209.
- Harvey, P. H. and Clutton-Brock, T. H. 1985. Life-history variation in primates. *Evolution*, 39: 559–581.
- Harvey, P. H. and Pagel, M. D. 1991. *The comparative method in evolutionary biology*. Oxford University Press, Oxford. 240 pp.

- Haug, R. and Tjemsland, J. 1986. Changes in size- and age-distributions and age at sexual maturity in Atlantic halibut, *Hippoglossus hippoglossus*, caught in North Norwegian waters. *Fish Research*, 4: 145–155.
- Hempel, G. 1978. North sea fisheries and fish stocks – a review of recent changes. *Rapports et Procès-Verbaux du Conseil International pour l'Exploration de la Mer*, 173: 145–167.
- Horwood, J. W., Bannister, R. C. A., and Howlett, G. J. 1986. Comparative fecundity of North Sea plaice (*Pleuronectes platessa* L.). *Proceedings of the Royal Society of London B*, 228: 401–431.
- Hubold, G. 1978. Variations in growth rate and maturity of herring in the North sea in the years 1955–1973. *Rapports et Procès-Verbaux du Conseil International pour l'Exploration de la Mer*, 172: 154–163.
- Hutchings, J. A. 1993. Reaction norms of reproductive traits in brook trout and their influence on life history evolution affected by size-selective harvesting. *In* The exploitation of evolving resources, pp. 107–125. Ed. by T. K. Stokes, J. M. McGlade, R. Law. *Lecture Notes in Biomathematics*, 99. Springer Verlag, Berlin. 264 pp.
- Hutchings, J. A. and Morris, D. W. 1985. The influence of phylogeny, size and behaviour on patterns of covariation in salmonid life histories. *Oikos*, 45: 118–124.
- ICES. 1993. Report of the working group on the assessment of Northern Shelf demersal stocks. *ICES C.M. 1993/Assess*: 20, 450 p.
- Jennings, S. and Beverton, R. J. H. 1991. Intraspecific variation in the life history tactics of Atlantic herring stocks. *ICES Journal of Marine Science*, 48: 117–125.
- Jensen, A. L. 1981. Population regulation in lake whitefish, *Coregonus clupeaformis* (Mitchill). *Journal of Fish Biology*, 19: 557–573.
- Jørgensen, T. 1990. Long-term changes in age at sexual maturity of Northeast Arctic cod (*Gadus morhua* L.). *Journal du Conseil International pour l'Exploration de la Mer*, 46: 235–248.
- Kelly, K. H. and Stevenson, D. K. 1985. Fecundity of Atlantic herring (*Clupea harengus*) from three spawning areas in the Western Gulf of Maine, 1969 and 1982. *Journal of Northwest Atlantic Fisheries Sciences*, 6: 149–155.
- Kotilainen, P. and Aro, E. 1991. Changes in growth rate of Baltic herring and their causes in the Northern Baltic Sea. *ICES C.M. 1991/J*: 17, 22 pp.
- Krementz, D. G., Sauer, J. R., and Nichols, J. D. 1989. Model-based estimates of annual survival rate are preferable to observed maximum lifespan statistics for use in comparative life-history studies. *Oikos*, 56: 203–208.
- Lebart, L., Morineau, A., and Warwick, K. M. 1984. Multivariate descriptive statistical analysis. *Correspondence Analysis and Related Techniques for Large Matrices*. Wiley, New York. 231 pp.
- Lecointre, G. 1994. Aspects historiques et heuristiques de l'ichtyologie systématique. *Cybiurn*, 18: 339–430.
- Mann, R. H. K., Mills, C. A., and Crisp, D. T. 1984. Geographical variation in the life-history tactics of some species of freshwater fish. *In* Fish reproduction: strategies and tactics, pp. 171–186. Ed. by G. W. Potts and R. J. Wootton. Academic Press, London. 410 pp.
- Murphy, G. I. 1968. Pattern in life history and the environment. *The American Naturalist*, 102: 391–403.
- Nei, M. 1987. Genetic distance and molecular phylogeny. *In* Population genetics and fishery management, pp. 193–223. Ed. by N. Ryman and F. Utter. Washington Sea Grant Program, Washington. 420 pp.
- Nelson, K. 1993. Individual variation in acquisition/allocation reaction norms. *In* The exploitation of evolving resources, pp. 91–106. Ed. by T. K. Stokes, J. M. McGlade and R. Law. *Lecture Notes in Biomathematics*, 99. Springer Verlag, Berlin. 264 pp.
- Overholtz, W. J. 1989. Density-dependent growth in the Northwest Atlantic stock of Atlantic mackerel (*Scomber scombrus*). *Journal of Northwest Atlantic Fisheries Sciences*, 9: 115–121.
- Overholtz, W. J., Murawski, S. A., and Michaels, W. L. 1991. Impact of compensatory responses on assessment advice for the Northwest Atlantic mackerel stock. *Fishery Bulletin*, 89: 117–128.
- Parmanne, R. 1992. Changes in the growth of herring in the Northern Baltic Sea in 1970–1991. *ICES C.M. 1992/J*: 42, 19 pp.
- Patriquin, D. G. 1967. Biology of *Gadus morhua* in Ogac Lake, a landlocked Fiord on Baffin Island. *Journal of the Fisheries Research Board of Canada*, 24, 12: 2573–2594.
- Pauly, D. 1980. On the interrelationships between natural mortality, growth parameters, and mean environmental temperature in 175 fish stocks. *Journal du Conseil International pour l'Exploration de la Mer*, 39: 175–192.
- Pelletier, D. 1990. Sensitivity and variance estimators for virtual population analysis and the equilibrium yield per recruit model. *Aquatic Living Resources*, 3: 1–12.
- Perrin, N. and Rubin, J. F. 1990. On dome-shaped norms of reaction for size-to-age at maturity in fishes. *Functional Ecology*, 4: 53–57.
- Pitt, T. K. 1975. Changes in abundance and certain biological characteristics of Grand Bank American Plaice, *Hippoglossoides platessoides*. *Journal of the Fisheries Research Board of Canada*, 32: 1383–1398.
- Platt, T. and Silvert, W. 1981. Ecology, physiology, allometry and dimensionality. *Journal of Theoretical Biology*, 93: 855–860.
- Purvis, A., Gittleman, J. L., and Luh, H.-K. 1994. Truth or consequences: effects of phylogenetic accuracy on two comparative methods. *Journal of Theoretical Biology*, 167: 293–300.
- Purvis, A. and Rambaut, A. 1995. Comparative analysis by independent contrasts (CAIC): an Apple Macintosh application for analysing comparative data. *CABIOS*, 11: 247–251.
- Read, A. F. and Harvey, P. H. 1989. Life history differences among the eutherian radiations. *Journal of Zoology*, London, 219: 329–353.
- Reiss, M. J. 1989. The allometry of growth and reproduction. Cambridge University Press, Cambridge, 182 p.
- Reznick, D., Callahan, H., and Lauredo, R. 1996. Maternal effects on offspring quality in Poeciliid fishes. *American Zoologist*, 36: 147–156.
- Reznick, D. N. 1993. Norms of reaction in fishes. *In* The exploitation of evolving resources, pp. 72–90. Ed. by T. K. Stokes, J. M. McGlade and R. Law. *Lecture Notes in Biomathematics*, 99. Springer Verlag, Berlin. 264 pp.
- Ricker, W. E. 1981. Changes in the average size and average age of Pacific Salmon. *Canadian Journal of Fisheries and Aquatic Sciences*, 38: 1636–1656.
- Rijnsdorp, A. D. 1989. Maturation of male and female North Sea plaice (*Pleuronectes platessa* L.). *Journal du Conseil International pour l'Exploration de la Mer*, 46: 35–51.
- Rijnsdorp, A. D. 1991. Changes in fecundity of female North Sea plaice (*Pleuronectes platessa* L.) between three periods since 1900. *ICES Journal of Marine Science*, 48: 253–280.
- Rijnsdorp, A. D., Daan, N., van Beek, F. A., and Heessen, H. J. L. 1991. Reproductive variability in North Sea plaice, sole, and cod. *Journal du Conseil International pour l'Exploration de la Mer*, 47: 352–375.
- Rijnsdorp, A. D. and van Leeuwen, P. I. 1992. Density-dependent and independent changes in somatic growth of female North Sea plaice *Pleuronectes platessa* between 1930 and 1985 as revealed by back-calculation of otoliths. *Marine Ecology Progress Series*, 88: 19–32.



- Rijnsdorp, A. D. and van Leeuwen, P. I. 1996. Changes in growth of North Sea plaice since 1950 in relation to density, eutrophication, beam-trawl effort, and temperature. ICES Journal of Marine Science, 53: 1199–1213.
- Roff, D. A. 1984. The evolution of life history parameters in teleosts. Canadian Journal of Fisheries and Aquatic Sciences, 41: 989–1000.
- Roff, D. A. 1991. The effects of life-history variation in fishes, with particular reference to flatfish. Netherlands Journal of Sea Research, 27: 197–207.
- Roff, D. A. 1992. The evolution of life histories: theory and analysis. Chapman and Hall, New York. 550 pp.
- Ross, M. R. and Almeida, F. P. 1986. Density-dependent growth of Silver Hakes. Transactions of the American Fisheries Society, 115: 548–554.
- Rowell, C. A. 1993. The effects of fishing on the timing of maturity in North Sea cod (*Gadus morhua* L.). In The exploitation of evolving resources, pp. 44–61. Ed. by T. K. Stokes, J. M. McGlade and R. Law. Lecture Notes in Biomathematics, 99. Springer Verlag, Berlin. 264 pp.
- Schaffer, W. M. and Elson, P. F. 1975. The adaptive significance of variations in life history among local populations of atlantic salmon in North America. Ecology, 56: 577–590.
- Schmaulhausen, I. I. 1949. Factors of evolution. Blakeston, Philadelphia, 327 pp.
- Stearns, S. C. 1983. The influence of size and phylogeny on patterns of covariation among life-history traits in the mammals. Oikos, 41: 173–187.
- Stearns, S. C. 1992. The evolution of life histories. Oxford University Press, Oxford. 250 pp.
- Stearns, S. C. and Crandall, R. E. 1984. Plasticity for age and size at sexual maturity: a life-history response to unavoidable stress. In Fish reproduction: strategies and tactics, pp. 13–53. Ed. by G. W. Potts and R. J. Wootton. Academic Press, London. 410 pp.
- Stearns, S. C. and Koella, J. C. 1986. The evolution of phenotypic plasticity in life-history traits; predictions of reaction norms for age and size at maturity. Evolution, 40: 893–913.
- Trippel, E. A. 1995. Age at maturity as a stress indicator in fisheries. BioScience, 45: 759–771.
- von Bertalanffy, L. 1934. Untersuchungen über die Gesetzmäßigkeit des Wachstums. I. Allgemeine Grundlagen der Theorie, mathematische und physiologische Gesetzmäßigkeiten des Wachstums bei Wassertieren. Wilhelm Roux. Arch. EntwMech., 131: 613–652.
- Ware, D. M. 1984. Fitness of different reproductive strategies in teleost fishes. In Fish, reproduction: strategies and tactics, pp. 349–366. Ed. by G. W. Potts and R. J. Wootton. Academic Press, London. 410 pp.
- Wootton, R. J. 1984. Introduction: strategies and tactics in fish reproduction. In Fish reproduction: strategies and tactics, pp. 1–12. Ed. by G. W. Potts and R. J. Wootton. Academic Press, London. 410 pp.
- Xu, X., Baird, J., Bishop, C., and Hoenig, J. 1993. Temporal variability of maturity and spawning biomass in cod (*Gadus morhua*) in NAFO divisions 2J+3KL. NAFO Scientific Council Studies, 18: 21–22.

## Appendix A: Sensitivity analysis of total mortality to errors in natural mortality in VPA

The linear sensitivity coefficient of total mortality at age  $a$   $Z_a$  to natural mortality at age  $i$   $M_i$ ,  $F_a$  being fishing mortality at age  $a$ , is defined as:

$$S\left(\frac{Z_a}{M_i}\right) = \frac{\partial Z_a}{\partial M_i} \frac{M_i}{Z_a} = \frac{\partial Z_a}{\partial M_i} \frac{M_i}{Z_a} = \left( \frac{\partial F_a}{\partial M_i} + \frac{\partial M_a}{\partial M_i} \right) \frac{M_i}{Z_a}$$

(Pelletier, 1990)

Which means that, the higher the fishing mortality, the lower the ratio  $M/Z$  and hence the sensitivity.

$$\text{If } i < a, \quad \frac{\partial Z_a}{\partial M_i} = \frac{\partial F_a}{\partial M_i} = 0$$

$$\text{If } i = a, \quad \frac{\partial Z_a}{\partial M_a} = \frac{Z_a(1 - e^{-Z_a})}{M_a(1 - e^{-Z_a}) + Z_a(Z_a - M_a)}$$

$$\text{If } i > a \quad \frac{\partial Z_a}{\partial M_i} = - \frac{1}{1 - \left( \frac{1}{F_a} - \frac{1}{Z_a} + \frac{1}{1 - e^{-Z_a}} \right)} \frac{\partial \ln(N_a)}{\partial M_i},$$

$$\text{with } \frac{\partial \ln(N_a)}{\partial M_i} = \left( 1 - \frac{1}{\frac{1}{F_a} - \frac{1}{Z_a} + \frac{1}{1 - e^{-Z_a}}} \right) \frac{\partial \ln(N_{a+1})}{\partial M_i}$$

On can easily show that  $\frac{\partial Z_a}{\partial M_{a+j}} < \frac{\partial Z_{a+j}}{\partial M_{a+j}}$  for  $j = 1, 2, 3 \dots$

Which means that total mortality at age  $a$  is most sensitive to natural mortality at age  $a$ , relative to natural mortality at other ages.

An example of  $S(Z_a/M_a)$  for haddock in division VIa (West of Scotland), 1983–1992 (data from ICES, 1993) is provided in Table 8.

## Appendix B: References of the data

### Clupeiformes

#### South African *Engraulis capensis* cap A7

- Le Clus, F. 1979. Fecundity and maturity of anchovy *Engraulis capensis* off South West Africa. Fish. Bull. S. Afr., 11: 26–38.
- Le Clus, F. and Melo, Y. C. 1981. An assessment of the anchovy population in ICSEAF divisions 1.3, 1.4 and 1.5 in 1980. Colln. sci. Pap. int. Commn. Se Atl. Fish. (Part II), 8: 83–101.
- Melo, Y. C. 1985. Age composition of the south west African anchovy in 1984. Colln. sci. Pap. int. Commn. SE Atl. Fish. (Part II), 12: 63–68.

#### Bay of Biscay *Engraulis encrasicolus* encG8

- Astudillo, A. 1986. The anchovy in the bay of Biscay: recent data on the fishery. ICES C.M. 1986/H: 45.
- ICES. 1993. Report of the Working Group on the Assessment of the Stocks of Mackerel, Horse Mackerel, Sardine, and Anchovy. ICES C.M. 1993/Assess: 19.
- Lucio, P. and Uriarte, A. 1990. Aspects of the reproductive biology of the anchovy (*Engraulis encrasicolus* L. 1758) during 1987 and 1988 in the Bay of Biscay. ICES C.M. 1990/H: 27.

Table 8. Sensitivity of total mortality at age *a* to natural mortality at age *a* for West Scotland haddock.

| Age | 1983  | 1984  | 1985  | 1986  | 1987  | 1988  | 1989  | 1990  | 1991  | 1992  | Mean    |
|-----|-------|-------|-------|-------|-------|-------|-------|-------|-------|-------|---------|
| 0   | 0.973 | 0.982 | 0.986 | 0.944 | 0.721 | 0.343 | 0.829 | 0.973 | 0.726 | 0.725 | 0.82025 |
| 1   | 0.251 | 0.31  | 0.251 | 0.473 | 0.227 | 0.17  | 0.274 | 0.186 | 0.154 | 0.305 | 0.26006 |
| 2   | 0.201 | 0.218 | 0.219 | 0.271 | 0.153 | 0.184 | 0.181 | 0.082 | 0.118 | 0.221 | 0.1847  |
| 3   | 0.288 | 0.123 | 0.192 | 0.177 | 0.137 | 0.134 | 0.159 | 0.125 | 0.11  | 0.15  | 0.13952 |
| 4   | 0.226 | 0.125 | 0.136 | 0.234 | 0.13  | 0.136 | 0.124 | 0.123 | 0.071 | 0.143 | 0.14485 |
| 5   | 0.242 | 0.165 | 0.172 | 0.274 | 0.118 | 0.114 | 0.109 | 0.143 | 0.075 | 0.105 | 0.15174 |
| 6   | 0.197 | 0.153 | 0.124 | 0.322 | 0.073 | 0.22  | 0.068 | 0.252 | 0.092 | 0.107 | 0.16084 |
| 7   | 0.161 | 0.123 | 0.156 | 0.224 | 0.089 | 0.14  | 0.103 | 0.151 | 0.087 | 0.147 | 0.13807 |
| 8   | 0.225 | 0.186 | 0.22  | 0.286 | 0.15  | 0.204 | 0.165 | 0.214 | 0.148 | 0.211 | 0.2009  |

Martin, I. and Uriarte, A. 1989. Stock assessment of the Bay of Biscay anchovy and catch predictions for 1989. ICES C.M. 1989/H: 24, 16 pp.

Motos, L. pers. comm., for fecundity data.

Uriarte, A. and Astudillo, A. 1987. The anchovy in the Bay of Biscay: new data and analysis of the fishery 1974–1987. ICES C.M. 1987: H20.

#### Gulf of Lions *Engraulis encrasicolus* encM8

Pertierra, J. P. 1987. Crecimiento del Boqueron de la costa catalana. Inv. Pesqu., 21: 263–275.

Pertierra, J. P. 1992. Biología pesquera de la anchoa, *Engraulis encrasicolus*, del litoral catalan. Tesis Universidad Politecnica de Cataluna, Barcelona, 281 p.

#### Baltic Sea *Sprattus sprattus* sprB8

Aps, R. 1992. Growth of sprat in the Northern Baltic. ICES C.M. 1991/J: 44.

ICES. 1991. Report of the Working Group on the Assessment of Pelagic Stocks in the Baltic. ICES C.M. 1991/Assess: 18.

ICES. 1992. Report of the Working Group on the Assessment of Pelagic Stocks in the Baltic. ICES C.M. 1992/Assess: 13.

Torstensen, E. 1985. Fecundity of sprat from the Norwegian coast. ICES C.M. 1985/H: 56, 8 p.

#### North Sea *Sprattus sprattus* sprN7

Bailey, R. S. and Pipe, R. K. 1977. Preliminary observations on the maturation cycle and fecundity of sprats in the North-Western North sea. ICES C.M. 1977/H: 32.

ICES. 1976. Report of the Herring Assessment Working Group for the Area South of 62°N. ICES C.M. 1976/H: 2.

Johnson, P. O. 1970. The Wash sprat fishery. Fishery Investigations Series II, 26, 4.

Johnson, P. O. 1974. Report on the sprat sampling during the ICES young herring surveys, 1972–1974. ICES C.M. 1974/H: 8.

#### North Sea *Clupea harengus* harN2 and harN6

Baxter, I. G. and Pope, J. A. 1969. Annual variation in fecundity of Clyde springspawning herring. ICES C.M. 1969/H: 33.

Blaxter, J. H. S. and Hempel, G. 1963. The influence of egg size on Herring larvae (*Clupea harengus* L.). Journal du CIEM, 28, 1: 211–240.

Burd, A. C. 1962. Growth and Recruitment in the Herring of the southern North Sea. Fishery Investigations, London, Series II, 23: 5.

Burd, A. C. 1969. The state of the North Sea herring stock. ICES C.M. 1969/H: 29.

Cushing, D. H. and Burd, A. C. 1957. On the herring of the southern North sea. M.A.F.F. Fish. Invest. Ser. 2, 20, 2: 31 p.

Hickling, C. F. 1940. The fecundity of the herring of the southern North sea. J. Mar. Biol. Assoc. U.K., 24: 619–632.

ICES. 1975. Report of the ICES Working Group on the Bløden Tagging Experiment, 1969/70. Cooperative Research Report, 47.

#### Baltic Sea *Clupea harengus* harB7 (three stocks)

Hagström, O., Palmen, L. E., Degnbol, P., and Rechlin, O. 1983. Acoustic estimates of the herring and sprat stocks in the Baltic proper, the Bothnian Sea and the Gulf of Bothnia 1982. Preliminary results. ICES C.M. 1983/J: 9.

Kosior, M. and Strzyewska, K. 1979. The fecundity of Baltic herring. ICES C.M. 1979/J: 11.

Parmanne, R. 1990. Growth, morphological variation and migrations of herring (*Clupea harengus* L.) in the northern Baltic Sea. Finnish Fisheries Research, 10: 1–48.

Parmanne, R. and Kuittinen, E. 1991. Comparison of the fecundity on herring (*Clupea harengus* L.) in various areas of the northern Baltic Sea. Finnish Fisheries Research, 12: 157–164.

Von Weber, W. 1978. Bestandskundliche Untersuchungen am Hering (*Clupea harengus* L.) der westlichen Ostsee in der Periode 1966/67. Meeresforsch., 26: 165–197.

#### Mediterranean *Sardina pilchardus* pilM7

Bouchereau, J. L. 1981. Contribution à l'étude de la biologie et de la dynamique de la population exploitée de *Sardina pilchardus* (Walbaum 1792) dans la baie d'Oran (Algérie). Thèse de l'Université d'Aix-Marseille II.

#### Adriatic *Sardina pilchardus* pilM8

Sinovic, G. 1984. Summary of biological parameters of sardine (*Sardina pilchardus* Walb.) from the central Adriatic. FAO Fish. Rep., 290: 147–148.

#### Bay of Biscay *Sardina pilchardus* pilG8

ICES. 1993. Report of the Working Group on the Assessment of the Stocks of Mackerel, Horse Mackerel, Sardine, and Anchovy. ICES C.M. 1993/Assess: 19.

- ICES. 1994. Report of the Working Group on the Assessment of Mackerel, Horse Mackerel, Sardine and Anchovy. ICES C.M. 1995/Assess: 2, 330 pp.
- Perez, N., Figueiredo, I., and Lo, N. C. H. 1992. Batch fecundity of *Sardina pilchardus* (Walb.) off the Atlantic Iberian coast. Bol. Inst. Esp. Oceanogr., 8, 1: 155–162.
- Perez, N., Porteiro, C., and Alvarez, F. 1995. Contribucion al conocimiento de labiologia de la sardina de Galicia. Bol. Inst. Esp. Oceanogr., 2, 3: 27–37.

## Argentiniformes

### Iceland *Argentina silus* silE8

- Magnusson, J. V. 1990. Ageing and age composition of silver smelt (*Argentina silus* Asc.) in icelandic waters. ICES C.M. 1990/G: 42.
- Mazhirina, G. P. 1991. Nature of spawning and formation of fecundity in argentine (*Argentina silus* Ascanius). ICES C.M. 1991/H: 57.
- Magnusson, J. V. 1988. On silver smelt (*Argentina silus* Asc.) in Icelandic waters. ICES C.M. 1988/G: 39.

### Norway *Argentina silus* silE8

- Johansen, P.-O. and Monstad, T. 1982. Preliminary results of Norwegian investigations on the greater silver smelt, *Argentina silus* (Ascanius). ICES C.M. 1982/G: 10.

## Salmoniformes

### Labrador *Salvelinus alpinus* alpO7

- Dempson, J. B. 1992. Assessment of the Nain stock unit Arctic charr population in 1991. CAFSAC Research Document 92/7: 28 p.
- Dempson, J. B. and Green, J. M. 1985. Life history of anadromous arctic charr, *Salvelinus alpinus*, in the Fraser River, northern Labrador. Can. J. Zool., 63: 315–324.

### Baffin Island *Salvelinus alpinus* alpO7

- Moore, J. W. 1975. Reproductive biology of anadromous arctic char, *Salvelinus alpinus* (L.), in the Cumberland Sound area of Baffin Island. J. Fish Biol., 7: 143–151.
- Moore, J. W. 1975. Distribution, movements, and mortality of anadromous arctic char, *Salvelinus alpinus* L., in the Cumberland Sound area of Baffin Island. J. Fish Biol., 7: 339–348.
- Moore, J. W. and Moore, I. A. 1974. Food and growth of arctic char, *Salvelinus alpinus* L., in the Cumberland Sound area of Baffin Island. J. Fish Biol., 6: 79–92.

### Alaska *Salvelinus malma* malP6

- Armstrong, R. H. 1974. Migration of anadromous Dolly Varden (*Salvelinus malma*) in southeastern Alaska. J. Fish. Res. Board Can., 31: 435–444.
- Armstrong, R. H. and Morrow, J. E. 1980. The dolly varden charr, *Salvelinus malma*. In Charrs, salmonid fishes of the genus *Salvelinus*, pp. 99–140. Ed. by E. K. Balon. The Hague.

### Barents Sea *Mallotus villosus* vilE6

- Forberg, K. and Tjelmeland, S. 1985. Maturity studies of Barents Sea capelin. Variations in length at maturity

for female capelin. Proceedings of the Soviet-Norwegian symposium on the Barents Sea capelin (*Mallotus villosus*): 213–221.

- Gjosaeter, H. 1985. Growth of the Barents Sea Capelin of the yearclasses 1975–1981. In The Proceedings from the Soviet-Norwegian Symposium on the Barents Sea Capelin, Bergen, August 1984, pp. 193–212. Ed. by H. Gjosaeter. Institute of Marine Research.
- Gjosaeter, J. and Monstad, T. 1973. Fecundity and egg size of spring spawning Barents Sea capelin. Fisk Dir. Skr. Ser. HavUnders., 16: 98–104.
- ICES. 1983. Report on the Atlanto-Scandian Herring and Capelin Working Group. ICES C.M. 1983/Assess: 4.

## Gadiformes

### North Sea *Gadus morhua* morN7

- Daan, N. 1974. Growth of North Sea cod, *Gadus morhua*. Neth. J. Sea Res., 8, 1: 27–48.
- ICES. 1974. Report of the North Sea Roundfish Working Group. ICES CM 1974/F: 5.
- Oosthuizen, E. and Daan, N. 1974. Egg fecundity and maturity of North Sea cod, *Gadus morhua*. Netherlands Journal of Sea Research, 8, 4: 378–397.

### North East Arctic *Gadus morhua* morE8

- Brander, K. 1994. Spawning and life history information for North Atlantic cod stocks. ICES Cooperative Research Report, 205: 150 p.
- ICES. 1993. Report of the Arctic Fisheries Working Group. ICES C.M. 1993/Assess 1: 169 p.
- Kjesbu, O. S. 1988. Fecundity and maturity of cod (*Gadus morhua* L.) from Northern Norway. ICES C.M. 1988/G: 28, 16 p.

### Baltic Sea *Gadus morhua* morB6

- Brander, K. 1994. Spawning and life history information for North Atlantic cod stocks. ICES Cooperative Research Report, 205: 150 p.
- ICES. 1978. Report of the Working Group on Assessment of Demersal Stocks in the Baltic. ICES C.M. 1978/J: 3.
- Schopka, S. A. 1971. Vergleichende Untersuchungen zur Fortpflanzungsrate bei Herings- und Kabeljaupopulationen (*Clupea harengus* L. und *Gadus morhua* L.). Ber. dt. wiss. Komm. Meeresforsch., 22: 31–79.
- Tiews, K. 1974. Further results of studies on the spawning stock of cod in the middle Baltic sea. Rapp. P.V. Réun. Cons. int. Explor. Mer, 166: 66–82.

### West Scotian shelf *Gadus morhua* morO8

- Brander, K. 1994. Spawning and life history information for North Atlantic cod stocks. ICES Cooperative Research Report, 205: 150 p.
- Campana, S. and Hamel, J. 1989. Status of the 4 × cod stock in 1988. CAFSAC Res. Doc. 89/30.
- Campana, S. and Hamel, J. 1992. Status of the 1991 4 × cod fishery. CAFSAC Research Document 92/46: 42 p.

### North Sea *Melanogrammus aeglefinus* aegN2 and aegN7

- Beverton, R. J. H. and Holt, S. J. 1957. On the dynamics of exploited fish populations. Her Majesty's Stationery Office, London, Fishery Investigations, Series II, 19: 533 p.
- Hislop, J. R. G. and Shanks, A. M. 1981. Recent investigations on the reproductive biology of the haddock, *Melanogrammus aeglefinus*, of the northern North Sea and the effects of fecundity of infection with the copepod parasite *Lernaecera branchialis*. J. Cons. Int. Explor. Mer, 39: 244–251.
- ICES. 1986. Report of the North Sea Roundfish Working Group. ICES C.M. 1986/Assess: 16.
- Jones, R. 1978. Estimates of the food consumption of haddock (*Melanogrammus aeglefinus*) and cod (*Gadus morhua*). J. Cons. int. Explor. Mer, 38, 1: 18–27.
- Jones, R. 1983. An investigation of North Sea haddock (*Melanogrammus aeglefinus*) length-at-age data, with particular reference to the effects on growth of the outstanding year classes of 1962 and 1967. J. Cons. int. Explor. Mer, 41: 50–62.
- Raitt, D. S. 1932. The fecundity of the Haddock. Fisheries, Scotland, Sci. Invest, I.

### North Atlantic *Micromesistius poutassou* pouE7

- Bailey, R. S. 1982. The population biology of blue whiting in the North Atlantic. Advances in Marine Biology, 19: 257–355.
- Bailey, R. S. 1978. Changes in the age composition of blue whiting in the spawning area west of Scotland, 1967–1978. ICES C.M. 1978/H: 52, 6 p.
- ICES. 1980. Report of the Blue Whiting Assessment Working Group. ICES C.M. 1980/H: 5, 64 p.
- Polonski, A. S. 1968. Materials on the biology of poutassou. Rapp. P.V. CIEM, 158: 105–108.

### North Sea *Trisopterus esmarki* esmN6 (two periods)

- Raitt, D. F. S. 1968. The population dynamics of the Norway pout in the North Sea. Department of Agriculture and Fisheries for Scotland. Marine Res., 5.

### North East Atlantic *Molva dypterygia* dypE7

- Thomas, R. 1987. Biological investigations on the blue ling, *Molva dypterygia dypterygia* (Pennant 1784 after O. F. Müller 1776) in the areas of the Faroe Islands and to the west of the Shetland Islands. Arch. FishWiss., 38: 9–34.

### Chile *Merluccius gayi* gayP6

- Aguayo, H. M. and Robotham, V. H. 1984. Dinamica poblacional de merluza comun (*Merluccius gayi gayi*) (Gadiformes: Merluccidae). Invest. Pesq. (Santiago), 31: 17–45.
- Aguayo, M. 1971. Determinacion de la edad en la merluza (*Merluccius gayi*) (Guichenot, 1848), mediante la lectura de otolitos. Bol. Cient. Inst. Fom. Pesq. Santiago, Chile, 16: 49.
- Balbontin, F. and Fischer, W. 1981. Ciclo sexual y fecundidad de la merluza, *Merluccius gayi gayi*, en la costa de Chile. Rev. Biol. Mar., 17: 285–334.

### Argentina *Merluccius hubbsi* hubA8

- Bezzi, S. I., Verazay, G. A., and Dato, C. V. 1995. Biology and fisheries of Argentine hakes (*M. hubbsi* and *M. australis*). In

- Hake. Biology, fisheries and markets, pp. 239–267. Ed. by J. Alheit and T. J. Pitcher. Chapman and Hall, Londres.
- Gaggiotti, O. E. and Renzi, M. A. 1990. El crecimiento alométrico en la merluza comun (*Merluccius hubbsi*) y eleccion de un modelo de crecimiento apropiado. Frente Marítimo, 6, Sec. A: 7–24.

### Gulf of Lions *Merluccius merluccius* merM9

- Albebert, Y. and Recasens, L. 1994. Growth of hake in the Gulf of Lions. An appraisal of the studies carried out by the "Growth working group" of the Farwest 2 MA 3-621 programme. Study for assessment and management of fisheries in the western Mediterranean. CCE, Rapport contrat no. MA 3-62.
- Biagi, F., Cesarini, A., Sbrana, M., and Viva, C. 1995. Reproductive biology and fecundity of *Merluccius merluccius* (Linnaeus, 1758) in the Northern Tyrrhenian sea. Rapp. comm. int. Mer Médit., 34: 237.

### Bay of Biscay *Merluccius merluccius* merG8

- ICES. 1993. Report of the Working Group on the Assessment of Southern Shelf Demersal Stocks. ICES C.M. 1993/Assess: 3.
- ICES. 1991. Report of the Working Group on the Assessment of the Stocks of Hake. ICES C.M. 1991/Assess: 20, 181 p.
- Martin, I. 1991. A preliminary analysis of some biological aspects of hake (*Merluccius merluccius* L. 1758) in the Bay of Biscay. ICES C.M. 1991/G: 54.
- Perez, N. and Pereiro, F. J. 1985. Aspectos de la reproducción de la merluza (*Merluccius merluccius* L.) de la plataforma gallega y cantabrica. Boletín Instituto Español de Oceanografía, 2, 3: 39–47.

### Spain *Merluccius merluccius* merE7

- ICES. 1994. Report of the Working Group on the Assessment of Southern Shelf demersal stocks. ICES C.M. 1994/Assess: 3.
- Iglesias, S. and Dery, L. 1981. Age and growth studies of hake (*Merluccius merluccius* L.) from ICES divisions VIIIc and IXa. ICES C.M. 1981/G: 38.
- Perez, N. and Pereiro, F. J. 1981. First data on sexual maturation and sex-ratio of hake (*Merluccius merluccius* L.) from ICES divisions VIIIc and IXa. ICES C.M. 1981/G: 37.
- Perez, N. and Pereiro, F. J. 1985. Aspectos de la reproducción de la merluza (*Merluccius merluccius* L.) de la plataforma gallega y cantabrica. Bol. Inst. Esp. Oceanog., 2, 3: 39–47.

### North East Pacific *Merluccius productus* proP7

- McFarlane, G. A. and Beamish, R. J. 1986. Biology and fishery of Pacific hake (*Merluccius productus*) in the Strait of Georgia. Mar. Fish. Rev., 47: 23–34.

## Lophiiformes

### Ægean Sea *Lophius budegassa* budM7

- Tsimenidis, N. C. and Ondrias, J. C. 1980. Growth studies on the angler-fishes *Lophius piscatorius* L., 1758 and *Lophius budegassa* Spinola, 1807 in greek waters. Thalassographica, 2, 3: 63–94.
- Tsimeinidis, N. C. 1980. [Contribution to the study of the angler-fishes *Lophius budegassa* Spinola, 1807 and *L. piscatorius* L., 1758].



torius L., 1758 in greek seas]. Institute of oceanographic and fisheries research, Special Publication, 4: 190 p.

## Atheriniformes

### Gulf of Lions *Atherina boyeria* boyL7 (two stocks)

Marfin, J. P. 1981. Biologie de l'athérine: *Atherina boyeri* Risso, 1810 (Poisson, Téléostéen) dans trois milieux saumâtres du Roussillon (Leucate, Canet, Bourdigou). Thèse de troisième cycle de l'Université de Perpignan: 238 p.

## Perciformes

### Florida and Carolina *Scomberomorus cavalla* cavO7 (two stocks)

Finucane, J. H., Collins, L. A., Brusher, H. A., and Saloman, C. H. 1986. Reproductive biology of king mackerel, *Scomberomorus cavalla*, from the southeastern United States. Fish. Bull., 84: 841–850.

Johnson, A. F., Fable, W. A. Jr., Williams, M. L., and Barger L. E. 1983. Age, growth, and mortality of king mackerel, *Scomberomorus cavalla*, from the southeastern United States. Fish. Bull., 81: 97–106.

### East Atlantic *Scomber scombrus* scoE9

ICES. 1993. Report of the Working Group on the Assessment of the Stocks of Mackerel, Horse Mackerel, Sardine, and Anchovy. ICES C.M. 1993/Assess: 19.

ICES. 1993. Report of the mackerel/horse mackerel egg production workshop. ICES C.M. 1993/H: 4.

ICES. 1994. Report of the working group on the assessment of mackerel, horse mackerel, sardine and anchovy. ICES CM 1995/Assess: 2, 330 p.

### Bay of Biscay *Trachurus trachurus* traG8

Deniel, C. 1989. Modalités de l'ovogenèse et de la ponte, fécondité du chinchard *Trachurus trachurus* du golfe de Gascogne. Rapport final, contrat IFREMER-UBO n° 88.5.51.2003: 27 p.

ICES. 1990. Report of the Working Group on the Assessment of the Stocks of Sardine, Horse Mackerel, and Anchovy. ICES C.M. 1990/Assess: 24.

ICES. 1994. Report of the Working Group on the Assessment of the Stocks of Sardine, Horse Mackerel, and Anchovy. ICES C.M. 1990/Assess: 2, 330 p.

Kerstan, M. 1988. Year-class strength and geographical variation in the sexual maturity of NE-Atlantic horse mackerel (*Trachurus trachurus* L.) – a case study. Arch. FischWiss., 38, 3: 133–163.

### South African *Trachurus trachurus* traA7

Draganik, B. 1977. Horse mackerel (*Trachurus trachurus* L.) fished in the southeast Atlantic. Colln. sci. Pap. int. Commn. SE. Atl. Fish., 4: 25–66.

Kompowski, A. and Slosarczyk, W. 1976. Some investigations on horse mackerel (*Trachurus trachurus* L.) in the ICSEAF area, in 1973. ICSEAF Coll. Sc. Pap. 3: 27–38.

Terre, J. J. 1976. Crecimiento y fecundidad del jurel (*Trachurus trachurus*, Linnaeus) de las divisiones 1.3 y 1.4 del area de CIPASO. ICSEAF Coll. Sc. Pap., 3: 39–44.

### Réunion *Lethrinus mahsena* mahP8

Bertrand, J. 1986. Contribution à l'évaluation de pêcheries exploitées par la Réunion (Océan Indien). Ms.

### Bay of Biscay *Mullus surmuletus* surG8

N'Da, K. 1992. Biologie du rouget de roche *Mullus surmuletus* (Poisson Mullidae) dans le nord du golfe de Gascogne: reproducteurs, larves et juvéniles. Thèse de Doctorat de l'Université de Bretagne Occidentale, Brest: 177 p.

Poulard, J. C. Personnal communication for length frequency data.

### West African *Pseudupeneus prayensis* praA7

Chabanne, J. 1987. Le peuplement des fonds durs et sableux du plateau continental sénégalais. Etude de sa pêche châtelière. Biologie et dynamique d'une espèce caractéristique: le rouget (*Pseudupeneus prayensis*). Editions ORSTOM, Collection Etudes et Thèses, Paris: 355 p.

### Cuba *Lutjanus synagris* synO7

Claro, R. 1981. Ecología y ciclo de vida de la biajaiba, *Lutjanus synagris* (Linnaeus), en la plataforma cubana. II. Biología pesquera. Academia de Ciencias de Cuba, Informe Científico-técnico, 177: 53 p.

Claro, R. 1982. Ecología y ciclo de vida de la biajaiba, *Lutjanus synagris* (Linnaeus), en la plataforma cubana. IV. Reproducción. Academia de Ciencias de Cuba, Reporte de Investigación del Instituto de Oceanología, 5: 37 p.

### Trinidad *Lutjanus synagris* synO8

Manickchand-Dass, S. 1987. Reproduction, age and growth of the lane snapper, *Lutjanus synagris* (Linnaeus) in Trinidad, West Indies. Bulletin of Marine Science, 40, 1: 22–28.

### Brazil *Lutjanus purpureus* purO6

De Menezes, M. F. and Gesteira, T. C. V. 1974. Idade e crescimento do pargo, *Lutjanus purpureus* Poey, do norte e nordeste do Brasil. Arq. Ciên. Mar, 14, 2: 81–85.

Fonteles-Filho, A. A. 1976. Uso de equação exponencial para o cálculo do coeficiente de mortalidade total do pargo, *Lutjanus purpureus* Poey, ao largo do Nordeste do Brasil. Arq. Ciên. Mar, 16, 1: 31–44.

Gesteira, T. C. V. and Ivo, C. T. C. 1973. Estudo da reprodução e fecundidade do pargo, *Lutjanus purpureus* Poey, do norte e nordeste do Brasil. Arq. Ciên. Mar, 13, 2: 109–112.

Mota Alves, M. I. 1971. Sobre a maturação sexual do pargo, *Lutjanus purpureus* Poey, do nordeste brasileiro. Arq. Ciên. Mar, 11, 2: 153–158.

### North Carolina *Rhomboplites aurorubens* aurO7

Grimes, C. B. 1978. Age, growth, and length-weight relationship of vermilion snapper, *Rhomboplites aurorubens* from

- North Carolina and South Carolina waters. *Trans. Am. Fish. Soc.*, 107, 3: 454–456.
- Grimes, C. B. and Huntsman, G. R. 1980. Reproductive biology of the vermilion snapper, *Rhomboplites aurorubens*, from North Carolina and South Carolina. *Fisheries Bulletin*, 78, 1: 137–146.
- Huntsman, G. R., Manooch C. S. III, and Grimes, C. B. 1983. Yield per recruit models of some reef fishes of the U.S. south Atlantic Bight. *Fishery Bulletin*, 81, 4: 679–695.
- Manooch C. S. III and Huntsman, G. R. 1976. Age, growth and mortality of the red porgy, *Pagrus pagrus*. *Trans. Am. Fish. Soc.*, 106: 26–33.

#### Curaçao *Epinephelus cruentatus* cruO7

- Nagelkerken, W. P. 1979. Biology of the Graysby, *Epinephelus cruentatus*, of the coral reef of Curaçao. *Stud. Fauna Curaçao*, 60: 1–118.

#### Gulf of Lions *Dicentrarchus labrax* labM7

- Barnabé, G. 1973. Contribution à la connaissance de la croissance et de la sexualité du loup (*Dicentrarchus labrax* L.) de la région de Sète. *Ann. Inst. océanogr.*, 49, 1: 49–75.
- Barnabé, G. 1976. Contribution à la connaissance de la biologie du loup *Dicentrarchus labrax* (L.) (Poisson Serranidae). Thèse de l'Université des Sciences et Techniques du Languedoc, Montpellier: 426 p.
- Barnabé, G. 1980. Exposé synoptique des données biologiques sur le loup ou bar *Dicentrarchus labrax* (Linne, 1758). *FAO Fish. Synop.*, 126: 70 p.
- Farrugio, H. and Le Corre, G. 1986. Interactions entre pêcheries de lagunes, pêcheries ôtières et pêche au chalut dans le Golfe du Lion. *Rapport Convention CEE XIV-B1-85/2/M10* P.

#### West African *Pagellus bellottii* belA7

- Franqueville, C. 1983. Biologie et dynamique de population des daurades (*Pagellus bellottii*, Steindachner 1882) le long des côtes sénégalaises. Thèse de Doctorat d'Etat, Université d'Aix-Marseille II: 276 p.

#### Gulf of Lions *Pagellus erythrinus* eryM7 and *Boops boops* boom7

- Girardin, M. 1980. Poissons Sparidés du Golfe du Lion. Rapport de l'Université des Sciences et Techniques du Languedoc, Montpellier.
- Girardin, M. 1981. *Pagellus erythrinus* (Linnaeus 1758) et *Boops boops* (Linnaeus 1758) (Pisces, Sparidae) du Golfe du Lion. Thèse de 3ème cycle de l'Université des Sciences et Techniques du Languedoc, Montpellier.

#### South African *Pachymetopon blochii* bloA6 and *Argyrozona argyrozona* argA6

- Nepgen, C. S. de V. 1977. The biology of the hottentot *Pachymetopon blochii* (Val.) and the silverfish *Argyrozona argyrozona* (Val.) along the cape South-west coast. *Investl. Rep., Sea Fish. Brch. S. Afr.*, 105: 1–35.

#### North Carolina *Pagrus pagrus* pagO7

- Manooch, C. S. III. 1976. Reproductive cycle, fecundity, and sex ratios of the red porgy, *Pagrus pagrus* (Pisces: Sparidae) in North Carolina. *Fish. Bull.*, 74: 775–781.

#### Gulf of Lions *Gobius niger* nigM8

- Joyeux, J. C., Bouchereau, J. L., and Tomasini, J. A. 1991. La reproduction de *Gobius niger* (Pisces, Gobiidae) dans la lagune de Mauguio – France. *Rapports gonadosomatiques, fécondités, ponte, oeufs et larves. Vie Milieu*, 41, 2/3: 97–106.
- Joyeux, J. C., Bouchereau, J. L., and Tomasini, J. A. 1991. Croissance et structure démographique de la population de *Gobius niger* Linné 1758 (poisson, téléostéen) dans une lagune nord-méditerranéenne. *Cah. Biol. Mar.*, 32: 415–437.

#### Gulf of Lions *Pomatoschistus minutus* minM8

- Bouchereau, J. L., Quignard, J. P., Tomasini, J. A., Joyeux, J. C., and Capapé, C. 1990. Cycle sexuel, condition, fécondité et ponte de *Pomatoschistus minutus* (Pallas, 1770) (Gobiidae) du Golfe du Lion, France. *Cybiurn*, 14, 3: 251–267.
- Bouchereau, J. L., Quignard, J. P., Tomasini, J. A., Joyeux, J. C., and Capapé, C. 1989. La population de *Pomatoschistus minutus* (Pallas 1770) de la lagune de Mauguio, France. Paramètres démographiques et croissance individuelle. *Cah. Biol. Mar.*, 30: 487–514.

#### Gulf of Lions *Pomatoschistus microps* micM8

- Bouchereau, J. L., Joyeux, J. C., Tomasini, J. A., and Quignard, J. P. 1989. Cycle sexuel, fécondités et condition de *Pomatoschistus microps* (Kroyer 1838) (Gobiidés) dans la lagune de Mauguio – France. *Bull. Ecol.*, 20, 3: 193–202.
- Bouchereau, J. L., Joyeux, J. C., and Quignard, J. P. 1989. Structure de la population de *Pomatoschistus microps* (Kroyer 1838) Poissons, Gobiidés, lagune de Mauguio (France). *Vie Milieu*, 39, 1: 19–28.

### Pleuronectiformes

#### Bristol Channel *Solea solea* solC8

- Horwood, J. 1993. The Bristol Channel sole (*Solea solea* (L.)): A fisheries case study. *Adv. Mar. Biol.*, 29: 215–368.
- ICES. 1992. Report of the Irish Sea and Bristol Channel Working Group. *ICES C.M. 1992/Assess: 1*.

#### Bay of Biscay *Solea solea* solG8

- ICES. 1992. Report of the Study Group on the Fecundity of Sole and Plaice in Sub Areas IV, VII, and VIII. *ICES C.M. 1992/G: 16*.
- ICES. 1993. Report of the Working Group on the assessment of Southern Shelf Demersal Stocks. *ICES C.M. 1993/Assess: 3*.

#### Gulf of Lions *Solea solea* solM8

- Cejpa, A. M. 1988. La sole (*Solea vulgaris*) dans le golfe du Lion: paramètres biologiques. Rapport IFREMER-CEPRALMAR: 75 p.
- Deniel, C. 1987. Variations géographiques de fécondité de la sole *Solea vulgaris*. Contrat IFREMER-UBO No. 85 5 30 0001, rapport final.



Farrugio, H., and Le Corre, G. 1986. Interactions entre pêcheries de lagunes, pêcheries côtières et pêche au chalut dans le Golfe du Lion. Rapport Convention CEE XIV-B1-85/2/M10 P.

### North Sea *Pleuronectes platessa* plaN4 and plaN7

- ICES. 1990. Report of the North Sea flatfish working group. ICES C.M. 1990/Assess: 6.
- Bannister, R. C. A. 1977. North Sea Plaice. In *Fish Population Dynamics*, pp. 243–282. Ed. by J. A. Gulland. Wiley, London.
- Rijnsdorp, A. D. 1989. Maturation of male and female North Sea plaice (*Pleuronectes platessa* L.). *J. Cons. int. Explor. Mer*, 46: 35–51.
- Rijnsdorp, A. D. 1991. Changes in fecundity of female North Sea plaice (*Pleuronectes platessa* L.) between three periods since 1900. *ICES Journal of Marine Sciences*, 48: 253–280.
- Rijnsdorp, A. D. and van Leeuwen, P. I. 1992. Density-dependent and independent changes in somatic growth of female North Sea plaice *Pleuronectes platessa* between 1930 and 1985 as revealed by back-calculation of otoliths. *Marine Ecology Progress Series*, 88: 19–32.
- Simpson, A. C. 1959. The spawning of the Plaice (*Pleuronectes platessa*) in the North Sea. *Fish. Invest. Lond. Ser.*, 2, 22, 7: 111 p.

### Celtic Sea *Pleuronectes platessa* plaC9

- Flatman, S. Personal communication for growth data.
- Horwood, J. W. 1993. Fecundity and biomass of plaice (*Pleuronectes platessa* L.) in the northern Celtic Sea. *ICES Journal of Marine Sciences*, 50: 315–323.
- Horwood, J. W. 1990. Fecundity and maturity of plaice (*Pleuronectes platessa*) from Cardigan Bay. *J. mar. biol. Ass. U.K.*, 70: 515–529.
- ICES. 1993. Report of the Working Group on the assessment of Southern Shelf demersal stocks. ICES C.M. 1993/Assess: 3.

### Gulf of Lions *Platichthys flesus* fleM8

- Vianet, R. 1985. Le flet du Golfe du Lion, *Platichthys flesus* Linne 1758. Systématique – Ecobiologie – Pêche. Thèse de l'Université des Sciences et Techniques du Languedoc, Montpellier.

### Baltic Sea *Platichthys flesus* fleB5

- Cieglewicz, W. 1959. Flounder investigations in Gdansk Bay in 1959. *Annales Biologiques, CIEM*, 16: 111–112.
- Cieglewicz, W. 1962. Composition of Polish flatfish catches in the Baltic in 1962. *Annales Biologiques, CIEM*, 19: 84.
- Cieglewicz, W. 1960. Composition of the Polish Flounder catches in the Southern Baltic in 1960. *Annales Biologiques*, 17: 116–117.
- Kändler, R. and Pirwitz, W. 1957. Über die Fruchtbarkeit der Plattfische im Nordsee-Ostsee Raum. *Kiel. Meeresforsch.*, 13: 11–34.

### Channel *Limanda limanda* limC8

- Deniel, C. 1981. Les poissons plats (Téléostéens, Pleuronectiformes) en baie de Douarnenez. Reproduction, croissance, et

migrations des Bothidae, Scophthalmidae, Pleuronectidae et Soleidae. Thèse de Doctorat d'Etat de l'Université de Bretagne Occidentale, Faculté des Sciences et Techniques de Brest, 476 p.

Deniel, C. and Tassel, M. 1986. Reproduction et croissance de la limande *Limanda limanda* (Linnaeus, 1758) (Téléostéen, Pleuronectidae) en Manche orientale et baie de Douarnenez. *Cybiurn*, 10, 2: 155–176.

Tassel, M. 1988. Biologie halieutique de la limande (*Limanda limanda* L.) en Manche orientale et mer du Nord. Thèse de l'Université des Sciences et Techniques, Lille, 237 p.

### California *Microstomus pacificus* pacP4

Hagerman, F. B. 1952. The biology of the Dover sole *Microstomus pacificus* (Lockington). *Calif. Dept. Fish Game Fish Bull.*, 85: 1–48.

### Pacific *Hippoglossus stenolepsis* steP7 (two stocks)

- Hoag, S. H. and McNaughton, R. J. 1978. Abundance and fishing mortality of Pacific Halibut, cohort analysis, 1935–1976. *International Pacific Halibut Commission, Scientific Report*, 65: 45 p.
- Schmitt, C. C. and Skud, B. E. 1978. Relation of fecundity of long-term changes in growth, abundance and recruitment. *International Pacific Halibut Commission, Scientific Report*, 66: 31 p.

## Scorpaeniformes

### Tasmania *Gymnapistes marmoratus* marP7

Grant, C. J. 1972. The biology of the soldier fish, *Gymnapistes marmoratus* (Pisces: Scorpaenidae). *Aust. J. mar. Freshwat. Res.*, 23: 151–163.

### North Pacific *Sebastes alutus* aluP6 (two stocks)

Gunderson, D. R. 1977. Population biology of Pacific Ocean Perch, *Sebastes alutus*, stocks in the Washington–Queen Charlotte Sound region, and their response to fishing. *Fish. Bull.*, 75, 2: 369–403.

### Gulf of St Lawrence *Sebastes mentella* menO8

- Morin, B. and Bernier, B. 1992. Evaluation du stock de sébaste (*Sebaste spp.*) du golfe du Saint-Laurent: 4RST+3Pn4Vn (jan.–mai). *CAFSAC Research Document 92/59*: 45 p.
- Laberge, E. and Hurtubise, S. 1989. Evaluation du stock de sébaste (*Sebastes spp.*) des divisions 4RST de l'OPANO. *CAFSAC Research Document 89/50*: 47 p.
- St-Pierre, J. F. and de Lafontaine, Y. 1995. Fecundity and reproduction characteristics of beaked redfish (*Sebastes fasciatus* and *S. mentella*) in the Gulf of St Lawrence. *Can. Tech. Rep. Fish. Aquat. Sci.*, 2059: 32+vii p.
